# Supplementary material for: Hydrologically Informed Machine Learning for Rainfall-Runoff Modelling: Towards Distributed Modelling
Source: Copernicus journal article supplement (doi:10.5194/hess-2020-487), 2020-10-19
Supplement: Supplementary file [file hess-2020-487-RC1-supplement.pdf]

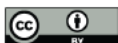

# Hydrologically Informed Machine Learning for Rainfall-Runoff Modelling: Towards Distributed Modelling

Herath Mudiyansele Viraj Vidura Herath<sup>1</sup>, Jayashree Chadalawada<sup>1</sup>, Vladan Babovic<sup>1</sup>

<sup>1</sup>Department of Civil and Environmental Engineering, National University of Singapore, 117576, Singapore

5 *Correspondence to:* Vladan Babovic (vladan@nus.edu.sg)

**Abstract.** Despite showing a great success of applications in many commercial fields, machine learning and data science models in general, show a limited use in scientific fields including hydrology. The approach is often criticized for lack of interpretability and physical consistency. This has led to the emergence of new paradigms, such as Theory Guided Data Science (TGDS) and physics informed machine learning. The motivation behind such approaches is to improve the physical  
10 meaningfulness of machine learning models by blending existing scientific knowledge with learning algorithms. Following the same principles, in our prior work (Chadalawada et al., 2020), a new model induction framework was founded on Genetic Programming (GP) namely Machine Learning Rainfall-Runoff Model Induction Toolkit (ML-RR-MI). ML-RR-MI is capable of developing fully-fledged lumped conceptual rainfall-runoff models for a watershed of interest using the building blocks of two  
15 flexible rainfall-runoff modelling frameworks (FUSE and SUPERFLEX). In this study, we extend ML-RR-MI towards inducing semi-distributed rainfall-runoff models. This effort is motivated by the desire to address the decreasing meaningfulness of lumped models which tend to particularly deteriorate within large catchments where the spatial heterogeneity of forcing variables and watershed properties are significant. Henceforth, our machine learning approach for rainfall-runoff modelling titled Machine Induction Knowledge-Augmented System Hydrologique Asiatique (MIKA-SHA)  
20 captures spatial variabilities and automatically **induces** rainfall-runoff models for the catchment of interest without any subjectivity in model selection. Currently, MIKA-SHA learns models utilizing the model building components of FUSE and SUPERFLEX. However, the proposed framework can be coupled with any **internally coherent collection of building blocks**. MIKA-SHA's model induction capabilities have been tested on the Red Creek catchment near Vestry, Mississippi, United States. The resulted model architectures through MIKA-SHA are compatible with previously reported research findings and fieldwork insights of the watershed and are readily interpretable by hydrologists.

## 25 **1 Introduction**

Understanding the underlying environmental dynamics occurring within watersheds is an essential and fundamental task in hydrology. Hydrological models play a key role in capturing the discharge **signatures** of watersheds. Irrespective of considerable advance over past decades, there is still some scope to advance state of art in hydrological knowledge to fully describe the functioning of a watershed upon a rainfall event owing to the highly complex, interdependent, and non-linear

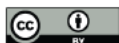

30 behaviours of governing physical phenomena. So far, no **hydrological model** can perform equally well over the entire range of  
problems. This leads to different research directions seeking different hydrological models based on different modelling  
strategies. Hydrological models are expected not only to have good predictive power but also to be interpretable in capturing  
relationships among the forcing terms and catchment response which may lead to the advancement of scientific knowledge  
(Babovic, 2005, 2009; Karpatne et al., 2017). Therefore, the final goal of any successful hydrological model must be based on  
35 a physically meaningful model architecture along with a good predictive performance.

Data science methods have shown limited success in many scientific fields including hydrology compared to the level of  
success in many commercial fields. Although the data-driven models are often performing better in terms of predictive  
capabilities than traditional physics-based, conceptual, and empirical hydrological models, they may contribute little towards  
the advancement of scientific discovery due to the lack of interpretability of the model configurations. Recently, a novel  
40 modelling paradigm called Theory Guided Data Science (TGDS) (Karpatne et al., 2017) or physics informed machine learning  
(Physics Informed Machine Learning Conference, 2016) has emerged to enhance the explainability of machine learning models  
or data science models in general. Here, the existing body of knowledge is blended with machine learning algorithms to induce  
physically consistent models.

In this contribution, following the above-mentioned modelling paradigm, we introduce a novel model **induction** engine called  
45 Machine Induction Knowledge-Augmented System Hydrologique Asiatique (MIKA-SHA) for automatic induction of semi-  
distributed models for a catchment of interest. This work is motivated by the success of our previously introduced  
(Chadalawada et al., 2020) model induction toolkit titled Machine Learning Rainfall-Runoff Model Induction Toolkit (ML-  
RR-MI). ML-RR-MI is capable of inducing fully-fledged lumped conceptual rainfall-runoff models for a watershed of interest.  
We use the term “hydrologically informed machine learning” to refer that the existing body of hydrological knowledge is used  
50 to govern the machine learning algorithms to induce physically consistent model configurations. The proposed framework  
uses Genetic Programming (GP) as its learning algorithm, whereas the model building modules of two flexible rainfall-runoff  
modelling frameworks (FUSE and SUPERFLEX) represent the elements of existing hydrological knowledge. The objectives  
of the current study involve 1) Incorporation of spatial heterogeneities of catchment properties and climate variables into the  
rainfall-runoff modelling while maintaining the model parsimony of induced models, 2) Adoption of a quantitative model  
55 selection approach to select an optimal model with appropriate complexity instead of “simpler the better” paradigm. The  
approach addresses the common hydrological issues, such as equifinality, subjectivity, and uncertainty, in the context of semi-  
distributed modelling and machine learning. This study is a part of larger ongoing research effort of using hydrologically  
informed machine learning for automated model induction.

The remaining of this text is arranged as follows. Section 2 provides a brief discussion on fundamental approaches in  
60 hydrological modelling. Section 3 discusses machine learning applications in water resources engineering. The proposed model  
induction framework is presented in Sect. 4. An application of the proposed framework is given in Sect. 5. The last two sections

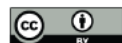

(Sect. 6 and Sect. 7) summarise the results of the case study and the conclusions made through the research findings. Additional details are presented in the Appendix.

## 2 Fundamental Approaches in Hydrological Modelling

### 65 2.1 Physics-based Models Vs Data Science Models

Physics-based or theory-based models are founded in scientific principles and theories to describe different hydrological processes. These models are following an approach where a hypothesis is assumed initially, and the observations are used to accept or reject it. The first reported physics-based model was introduced by Freeze and Harlan (1969). At the time, its usage was greatly limited due to computation demand and intensive data requirements.

70 The ideal solution to understanding and prediction of any environmental dynamic would be through physics-based models if and only if the body of knowledge is sufficient enough to fully describe the behaviour of those environmental processes. However, this is not the situation in hydrology and water resources science in general. For example, the use of the Darcy-Richards equation to represent subsurface flow may not be accurate if the soil properties are not uniform (Beven, 2012). On the other hand, with the advancement in the computer power and acquisition of data through remote sensing and geographical information systems, data science models gained more attraction in many fields. Especially, within the last two decades, there is an increase in data science model applications, such as machine learning models in hydrological modelling (Babovic and Abbott, 1997; Babovic, 2005; Yaseen et al., 2015). The data science models utilize the available data to build input-output relationships which provide actionable models with good predictive power. Both physics-based and data science models depend on data to a different extent. While physics-based models are frequently admired by the community due to its interpretability which may lead to better understand catchment dynamics, they often experience poorer predictive power than data science models. At the same time, simplistic applications of data-driven models which often result in higher prediction accuracies than the physics-based models may suffer serious difficulties with interpretation as they are unable to provide basic hydrological insights (Chadalawada et al., 2020). This dichotomy led to the evolution of two major communities in water resources engineering: those who work with physics-based modelling and those who deal with machine learning techniques, which appear to be working quite separately. Recently, a novel modelling paradigm called Theory Guided Data Science (TGDS) (Karpatne et al., 2017) or physics informed machine learning was emerged by combining the strengths of both physics-based models and data science models (Keijzer and Babovic, 2002, Babovic, 2009). The key concept behind this approach is to incorporate the existing body of scientific knowledge into learning algorithms to come up with physically meaningful models with good predictive power. Further details of this paradigm and its application in water resources are described in Sect. 3.

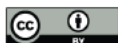

## 2.2 Fixed Models Vs Flexible Models

Another distinct modelling consideration in hydrology is related to the approach to conceptual modelling. Conceptual models consist of a collection of reservoir units that approximate the moisture storage within the basin. In earlier applications, conceptual models were also referred to as Explicit Soil Moisture Accounting (ESMA) models (O'Connell, 1991). Due to the conceptual representation instead of small-scale physics utilized in physics-based models, the complexities of conceptual models are largely reduced when compared to physics-based models. As the conceptual components are derived from known physics but in a simplified manner, conceptual models can provide good process representation and reasonable physical meaningfulness in the model configurations. However, the parameters of conceptual models are not directly linked to the physically measurable quantities as in physics-based models. Hence, it is often required to use calibration schemes to identify the appropriate combination of model parameter values. In practice, there might be different combinations of such parameter values which may result in the same level of model performance. This phenomenon is commonly known as equifinality which raises the important question of “are we getting the right results for the right reasons?” (Beven, 2012). Equifinality is one of the most crucial factors to be addressed in conceptual modelling.

Two types of modelling approaches can be identified within the conceptual modelling: the models based on a single hypothesis (fixed models) and the models based on multiple hypotheses (flexible models). Fixed models are built around a general model architecture that gives satisfactory model performances over a fairly broad range of watersheds and meteorological conditions. Rainfall-runoff models, such as NAM (Nielsen, 1973), TOPMODEL (Beven et al., 1995), SACRAMENTO (Burnash, 1995), and ARNO (Todini, 1996) belong to this category. Computational efficiency due to standardization, easy interpretability of connections among model parameters and basin characteristics benefit in model explanation and regionalization. These are the main reasons for the popularity of fixed models in hydrological modelling. At the same time, it is quite improbable for a model to perform equally well in completely different climates and geological regions. Further, the adaption of constitutive functions through the addition of specialized modules is often required in fixed models to facilitate the ensemble of processes over a range of watersheds. One alternative to handle this matter would be to test many fixed models on any single catchment to identify the most suitable, which, may be a considerable and cumbersome task. In addition to that, the unavailability of publicly available computer codes for most of the fixed models makes this approach challengeable. In a recent study (Knoben, 2019), an open-source toolbox including computer codes of 46 fixed conceptual models has been developed to facilitate the above-mentioned approach.

In contrast to fixed modelling, flexible modelling frameworks provide more granularity in model building by allowing the hydrologist to customize the model structure to suit the intended task. These flexible modelling frameworks provide model building blocks that can be arranged in different ways to test many hypotheses about catchment dynamics instead of the one fixed hypothesis in fixed models. Such robust quality of any modular modelling framework allows the modeller to consider the uniqueness of the area of his/her application. RRMT (Wagener et al., 2001), FUSE (Clark et al., 2008), MMS (Leavesley

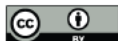

et al., 2008), SUPERFLEX (Fenicia et al., 2011; Kavetski and Fenicia, 2011), SUMMA (Clark et al., 2015a, 2015b), and RAVEN (Craig et al., 2020) are some widely used flexible modelling frameworks. The high degree of transferability in flexible  
125 modelling frameworks is an aiding factor in proceeding in the direction of a unified hydrological theory at a watershed level. Simultaneously due to the dynamic modularity and high level of granularity, constructing a suitable model for the watershed of concern may require significant effort and expert knowledge. Hence, a hydrologist with novice knowledge would require to test many model structures beforehand selecting an optimal model which is time demanding and computationally intensive, in consequence, hinders the opportunity to use the flexible modelling frameworks in their full potential. Further, the selection  
130 of a model configuration without testing a large number of possible combinations may introduce a high level of **subjectivity** into the model building phase. Therefore, we find a requirement to automate the model building phase to remove the subjectivity and consider many configurations without direct human involvement. Two flexible modelling frameworks used in the current study are briefly described below.

### 2.2.1 SUPERFLEX

135 SUPERFLEX (Fenicia et al., 2011; Kavetski and Fenicia, 2011) framework facilitates hydrologists to test many different hypotheses about the functioning of the watershed of interest using the model building components (reservoirs, junctions, and lag functions) available in the framework. The water storages within the catchment, such as soil moisture, interception, groundwater, and snow along with their release of water are represented through reservoir units. Junction elements conceptualize the merging and splitting of different fluxes in catchment dynamics (e.g. Hortonian flow, evaporation). Channel  
140 routing (delays in flow transmission) is described using lag functions. A number of constitutive functions are available to describe lag function characteristics and storage-discharge relationships of storage units (reservoirs). SUPERFLEX applications in rainfall-runoff modelling are found in van Esse et al. (2013), Fenicia et al. (2014, 2016), and Molin et al. (2020).

### 2.2.2 FUSE

Clark et al. (2008) developed Framework for Understanding Structural Errors (FUSE) to examine the effect of model structural  
145 differences on rainfall-runoff modelling. FUSE conceptualizes the functioning of a catchment using a two-zone model architecture: an unsaturated zone (upper soil layer) and a saturated zone (lower soil layer). The model building modules of FUSE involve the choice of upper and lower soil configurations and parameterization for different hydrological processes, such as evaporation, percolation, interflow, surface runoff, and baseflow. The modeller has the freedom of selecting these model building modules from four rainfall-runoff models (TOPMODEL, ARNO/VIC, SACRAMENTO, and PRMS) which  
150 are known as parent models. For more details and applications of FUSE, please refer to Clark et al. (2010) and Vitolo (2015).

## 2.3 Lumped Models Vs Distributed Models

Hydrological models are broadly classified into lumped and distributed models based on how they treat the spatial variabilities of catchment properties and climate variables. Lumped models ignore the spatial heterogeneity and recognize the whole



watershed as a single unit. Such models use catchment average variable values as model inputs. Most of the present-day  
155 conceptual models belong to this category. Ease and simplicity of use have made them a popular hydrological modelling  
approach. However, especially when the catchment size increases, the meaningfulness of the lumped values decreases and  
hence the inferences made on the basis of a lumped model may be accurate but not be reasonable or realistic. Further, the  
observations reveal a lack of consistency among different watersheds which leads to having an insufficient understanding of  
macro-scale patterns in hydrological behaviours across basins. Namely, there is a possibility that macro-scale patterns of  
160 catchments are governed by the heterogeneity (Nearing et al., 2020). In addition to that, if the modeller's requirement lies  
within the catchment (e.g. discharge at a particular location within the catchment), then the only option would be to adopt a  
distributed model where the spatial variabilities are considered in its modelling process. As stated in Fenicia et al. (2016),  
three distinct steps can be identified in any kind of distributed model building. The first step is to implement a spatial  
discretization scheme. Spatial discretization can be achieved by using either regular grids, irregular grids, and subcatchments,  
165 or Hydrological Response Units (HRUs). The next step is to define the model structure and the connections between the spatial  
elements. The final step is to achieve model parsimony through the specification of model parameters and state constraints.

The majority of distributed models are theory-based models (physics-based). They discretize the watershed into regular or  
irregular grids and use small-scale physics to model the fluxes through the spatial elements (commonly attributed to as fully  
distributed models). In the early stages of development, researchers believed that more data about the catchment properties  
170 and climate variables would be available with the advancement of technology and hence thought of including such data into  
hydrological modelling with the intention of achieving improvements in model simulations. This helped fully distributed  
modelling to attract a lot of attention among hydrologists. From its earliest applications like System Hydrologique Europeen  
model (SHE) (Abbot et al., 1986a, 1986b) hydrological community has invested heavily in these fully distributed hydrological  
(physics-based) models (e.g. Development of US National Water Model (Salas et al., 2018)).

175 One way of addressing the so-called uniqueness of the place as a major issue to deal with hydrological modelling (Beven,  
2020) is to use distributed models. At the early stages of distributed modelling, the approach was constrained due to the lack  
of data and computational power. Hence, it was thought that this approach will gain success with the advancement of  
technology. Until today, however, the distributed models have not achieved the expected outcome. This points out that the  
problem lies not only in the lack of local information but also due to the issues in how processes are represented within the  
180 distributed model (Beven, 2020). The high complexity and the huge demand for the input data, such as topography, geology,  
soil, and land use are the main limitations of fully distributed models. The more granular approach requires a large number of  
model parameters which often leads to over-parameterization. A comprehensive review of applications, challenges, and future  
trends of fully distributed modelling in hydrology is presented in Fatichi et al. (2016).

An effective alternative for both lumped and fully distributed models would be the semi-distributed models where separate  
185 conceptual models are assigned to functionally distinguishable land segments (Boyle et al., 2001). In the semi-distributed



modelling approach, each model operates individually and there are no interconnections or dependencies with other models in the network. This and the use of conceptual models instead of small-scale physics make this approach several orders less complex than the fully distributed models. However, semi-distributed models are much more complex than lumped conceptual models, because they consider the spatial variabilities of catchment properties and climate variables, resulting in more meaningful inferences gained through the model. In early applications (Boyle et al., 2001), subcatchments were identified as functionally distinguishable land segments. But, with the popularity of the Hydrological Response Unit (HRU) concept, HRUs were used as functionally distinguishable land elements (e.g. Fenicia et al., 2016). In a semi-distributed model, the total catchment response consists of the routed sum of the individual model responses of each spatial element. Spatial Tools for River basins and Environment and Analysis of Management options (STREAM) (Aerts et al., 1999) and Soil and Water Assessment Tool (SWAT) (Arnold et al., 1998) can be categorized as semi-distributed models.

### 3 Machine Learning in Water Resources

Machine learning or data science in general, have become an irreplaceable tool, not only in commercials but also in many scientific fields. They have shown superior performances in many applications including language translation, object tracking, autonomous driving, and character recognition (Karpatne et al., 2017). Data-driven techniques started to gain a lot of attention among the hydrologists within the last two decades. Artificial Neural Networks (ANN), Evolutionary Computation (EC), Wavelet-Artificial Intelligence models (W-AI), Support Vector Machines (SVM), and Fuzzy set are the most popular data science techniques in hydrological modelling (Yaseen et al., 2015). Each of these techniques has its strengths and weaknesses. The scope of this paper does not discuss different data-driven techniques in detail. Instead, interested readers are directed to review papers by Govindaraju (2000), Yaseen et al. (2015), Mehr et al. (2018), and the textbook by Hsieh (2009).

Machine learning models have shown encouraging performances in a range of water resources applications, such as **rainfall-runoff modelling** (Minns and Hall, 1996; Khu et al., 2001; Babovic and Keijzer, 2002; Chiang et al., 2004), streamflow forecasting (Nourami et al., 2009; Meshgi et al., 2014, 2015; Humphrey et al., 2016; Karimi et al., 2016), estimation of missing data (Elshorbagy et al., 2002), error correction (Sun et al., 2012), water quality modelling (Savic and Khu, 2005; Singh et al., 2011; García-Alba et al., 2019), sediment transport modelling (Babovic and Abbott, 1997; Afan et al., 2014; Safari and Mehr, 2018), reservoir management (Giuliani et al., 2015), prediction of climate variables (Dahamsheh and Aksoy, 2013; Ferreira et al., 2019), because of their potential to apprehend the noise complexity, non-linearity, non-stationarity and dynamism of data (Yaseen et al., 2015). Certainly, if we are only interested in better forecasting results then, the machine learning models might be the preferred choice over the conceptual or **process-based** models due to their better predictive capability. Another major advantage of a machine learning model is that it requires **much less effort** to develop and calibrate than a physics-based model.

Data-driven techniques have made it possible to develop actionable models with high prediction accuracy without depending on **scientific theories**. At the same time, this very nature of data-driven models has become the main point of criticism



especially in scientific fields including hydrology. They are regularly quoted as black-box models where the user has little or no knowledge about how the model makes its predictions. Karpatne et al. (2017) offer two reasons for the limited success of data-driven models in scientific fields. The first reason is the limited availability of labelled instances for the model training  
220 which makes it harder to extrapolate model predictions beyond the available labelled data. The second reason is associated with the objectives of the scientific discovery where the final goal is not only to have actionable models but also to convey a mechanistic awareness of underlying operations which may lead to the advancement of scientific knowledge. Further, data science models, such as Deep Learning (DL) models have shown better performances in hydrograph predictions than the traditional approaches in ungauged catchments (Kratzert et al., 2019). At the same time, a recent paper (Beven, 2020),  
225 questions the performance of a DL model in ungauged catchments when the geological characteristics are not well defined within the model. According to this paper, DL models have not solved the ungauged catchment problem and they have just achieved higher efficiency values than the traditional approaches.

Nearing et al. (2020) argue that there is a danger for the hydrologic community in not recognizing the potential of machine learning offers for the future of hydrological modelling. The authors argue that machine learning models can capture catchment  
230 similarities by providing good results even for the catchments which were not used for the training of those models. This implies the capability of machine learning models in developing catchment scale theories **which** traditional models were unable to do so well. Further, the authors reject the most common criticism on machine learning models (the lack of explainability) by stating that even the accuracy of process representation in physics-based models is questionable due to their poorer prediction accuracies, criticizing only on machine learning models is unfair and meaningless. Despite having a huge potential  
235 within machine learning models, the state of art machine learning capabilities have not been tested in hydrological modelling and they expect even distributed hydrological models are to be developed primarily on machine learning in near future. Beven (2020) highlights the importance of the interpretability of DL models and suggests more direct incorporation of process information into such models. Further, he points out that machine learning models should also need to pay attention to similar issues associated with traditional modelling approaches like data and parameter uncertainties and equifinality. A brief  
240 discussion of two widely used machine learning techniques in hydrology is presented below.

### **3.1 Artificial Neural Networks (ANN)**

ANNs (McClelland and Rumelhart, 1986) are the most popular machine learning technique in many commercial and scientific fields including hydrology. ANN is a computing model transpired by the functionality of neurons in a human brain, that is widely used to compute and process complex functional units. A wide range of successful applications, such as clustering,  
245 pattern recognition, classification, and identifying non-linear relationships have made ANNs a popular data-driven modelling technique. Typically, ANN architecture consists of three components i) input layer with several input nodes ii) One or more hidden layers with the activation function iii) Output layer with several output nodes (Yaseen et al., 2015). Successful ANN applications in water resources engineering include rainfall-runoff modelling (Minns and Hall, 1996; Chiang et al., 2004),





streamflow estimation (Nourani et al., 2009; Humphrey et al., 2016), water quality modelling (Singh et al., 2011; García-Alba  
250 et al., 2019), groundwater modelling (Nayak et al., 2006; Gholami et al., 2015), data assimilation (Babovic et al., 2000;  
Vojinovic et al., 2003), estimation of climate variables (Dahamsheh and Aksoy, 2013; Ferreira et al., 2019), flood and drought  
forecasting (Chang et al., 2014; Dehghani et al., 2014) and sediment transport modelling (Afan et al., 2014). Most of the above  
applications use supervised learning ANN models, such as Feed Forward Back Propagation (FFBP), Radial Basis Function  
Neural Network (RBFNN), and Generalized Regression Neural Network (GRNN). High accuracy and tolerance for noisy data  
255 make ANN suitable for applications where conventional mathematical methods and statistical models are inadequate. **The  
multi-layered architecture of an ANN can handle incomplete or erroneous data, highly complex and interdependent parameters.  
One of the key disadvantages of using ANN for data modelling is the fact that it produces overfitting results which make it  
difficult to extrapolate beyond witnessed train data. Furthermore, determining the efficient network architecture and tuning  
hyperparameters make it hard for the user to completely understand how the model makes its predictions. Thus, many scientists  
260 criticise the use of ANN as a black box which prohibits the interpretation and understanding of the model. Hence, the user  
must be cautious of the practical usage and limitations of the resultant model.**

Deep learning (DL) is a new direction in ANN research that is widely used for clustering and regression tasks in many  
disciplines including hydrology. There is no definite definition for DL models, but neural networks with large multilayer  
architectures (large depth) that work with big, raw data are generally referred to as DL models (Shen, 2018). DL models are  
265 capable of extracting abstract features from raw data automatically via the hidden layers. Two of the well-established classes  
in DL are Convolutional Neural Networks (CNNs) for clustering tasks, such as computer vision and image analysis, and  
Recurrent Neural Networks (RNNs) for regression tasks, like modelling sequential data and time series analysis (Hu et al.,  
2018). Long Short-Term Memory (LSTM) is the most successful RNN architecture which utilizes gates and memory cells to  
retain state information of sequential data. Hence, LSTMs are more suitable for hydrological modelling applications, such as  
270 rainfall-runoff modelling. The state of art DL capabilities have not yet been tested in hydrological modelling and there are only  
a few DL applications so far (Shen et al., 2018). Successful DL applications in hydrology include rainfall-runoff modelling  
(Hu et al., 2018; Fan et al., 2020; Xiang et al., 2020), soil moisture modelling (Xiaodong et al., 2016), precipitation forecasting  
(Kumar et al., 2019), groundwater estimation (Afzaal et al., 2019) and uncertainty estimation (Gude et al., 2020).

### 3.2 Genetic Programming (GP)

275 Genetic Programming is an evolutionary computation algorithm (Koza, 1992) inspired through the basic principle of Darwin's  
theory of evolution. GP is capable of automatic generation of computer programs and falls under the supervised machine  
learning category. The most distinct feature of GP over the other machine learning techniques is its ability to produce  
mathematical expressions of input-output relationships. As a result, GP is referred to as a grey box data-driven technique and  
differentiates it from the other black box data-driven approaches, like ANNs. Other than that, its conceptual simplicity, the  
280 ability of parallel computing, and the capability of obtaining the near-global or global solution make GP a powerful machine

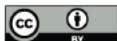

learning technique. There are different variants of GP like Monolithic GP (MGP), Multigene genetic programming (MGPP), Gene expression programming (GEP), Linear GP (LGP), and Grammar-based GP (GGP) (Mehr et al., 2018). Despite variants, the fundamental operations are quite similar. GP generates the structure of its solutions (GP individuals) by arranging mathematical functions, input variables, and random constants. These are known as the building blocks of the GP algorithm.

285 The algorithm starts with a randomly generated set of candidate solutions for the task at hand. The performance of each candidate is then assessed using a user-defined objective function. Individuals are selected by assigning higher chances of selection for better individuals (based on objective function value) to create offspring by apply genetic operators (crossover, mutation, and elitism). The new set of offspring becomes the candidate solutions in the next generation. This process is repeated until the algorithm meets its termination criteria (usually a maximum number of generations). The candidate solutions evolve

290 towards the global optimum when the GP algorithm curtails the error margin between the simulated values of its individuals and measured observations (Babovic and Keijzer, 2000). Successful GP applications in water resources engineering can be found in rainfall-runoff modelling (Khu et al., 2001; Babovic and Keijzer, 2002; Babovic et al., 2020), streamflow prediction (Meshgi et al., 2014, 2015; Karimi et al., 2016), water quality modelling (Savic and Khu, 2005), groundwater modelling (Datta et al., 2014), reservoir management (Giuliani et al., 2015), sediment transport (Babovic and Abbott, 1997; Safari and Mehr,

295 2018), climate variables and soil properties modelling (Bautu and Bautu, 2006; Elshorbagy and El-Baroudy, 2009).

### 3.3 Physics Informed Machine Learning

One promising way forward which may bridge the gap between physics-based and machine learning modelling communities would be to couple the existing hydrological knowledge to guide machine learning models (Babovic and Keijzer, 2002; Babovic, 2009). This recent paradigm is presently referred to as Theory Guided Data Science (TGDS) (Karpatne et al., 2017)

300 or Physics Informed Machine Learning (Physics Informed Machine Learning Conference, 2016). This modelling paradigm aims to simultaneously address the limitations of data science and physics-based models and induce more generalizable and physically consistent models. There are five ways of incorporating basic scientific knowledge with data-driven models (Karpatne et al., 2017): (i) theory-guided design of data science models, (ii) theory-guided learning of data science models, (iii) theory-guided refinement of data science outputs, (iv) learning hybrid models of theory and data science and (v)

305 augmenting theory-based models using data science. A typical physics informed machine learning model may follow one or more of the above mention approaches to bring together scientific knowledge and data science techniques. Although, there are few reported explainable artificial intelligence utilizations in hydrological modelling in past (e.g. Cannon and Mckendry, 2002; Keijzer & Babovic 2002; Fleming, 2007), there is an increasing trend of adopting theory-guided machine learning models for recent water resources applications (McGovern et al., 2019), such as hydroclimatic model building (Cannon and Mckendry,

310 2002), automated model building (Chadalawada et al., 2020) and hydrologic process simulation (Fleming, 2007). Even though there are attempts in almost every machine learning technique to incorporate existing hydrological knowledge into the basic frameworks, in the sequel, we only discuss such attempts in ANNs and GP.



ANNs suffer the most severe consequences of lack of interpretability of resulted models. An effective solution for this would be the use of augmented versions of neural networks where the existing theoretical knowledge is used to govern the learning algorithm to enhance the interpretability of induced models. Brunton et al. (2016), Raissi et al. (2017) and Rudy et al. (2017) used Physics Informed Neural Networks (PINN) in time series analysis to derive governing partial differential equations. Prediction of extreme rainfall events was carried out by Cannon (2018) using a neural network architecture constrained by physical laws. Wang et al. (2020) introduced a deep learning framework called Theory Guided Neural Networks (TGNN) for subsurface flow modelling where the governing equations, physical constraints, engineering controls and expert knowledge are used to guide the ANN model. Please refer to Fleming et al. (2014) and Xu et al. (2019), for further theory-guided neural network utilization in water resources.

Although the physics informed machine learning was only recently identified as a new modelling paradigm in the context of GP, there were attempts over past two decades to blend the hydrological knowledge into basic GP framework to induce more physically reliable hydrological models. To achieve physical consistency and dimensional accuracy of GP induced models, researches developed few enhanced versions of the GP algorithm by incorporating the existing hydrological knowledge. **Declarative bias and preferential bias** were incorporated with the model-building phase of GP to reduce physical contraventions and to achieve dimensional accuracy of induced equations (Babovic and Keijzer, 1999, 2002; Keijzer and Babovic, 2002). Authors have reported that this augmented version of GP resulted in fast convergence through the reduction of solution space and achieved more parsimonious and regularize expressions than traditional GP. Dimensionally aware GP was utilized to extract hydraulic formulae from measurements by Babovic et al. (2001). The inclusion of high-level theoretical concepts in sediment transport modelling with GP resulted in equal or superior performances than the traditional modelling with human expert knowledge (Baptist et al., 2007; Babovic, 2009). Another augmented version of GP was used for the identification of predominant processes in hydrological system dynamics by Selle and Muttil (2011). A reservoir model, a cumulative sum and delay function, and a moving average operator were incorporated as basic hydrological insights into the GP function set by Havlicek et al. (2013), to develop a rainfall-runoff prediction programme called SORD. They were able to achieve superior performances in terms of prediction accuracy with SORD than to ANNs and GP without above-mentioned special functions. GP was used as a model induction algorithm in Chadalawada et al. (2017), to optimize both model architecture and parameters to automatically induce most appropriate Tank model structure for a watershed of interest. Here, the hydrological knowledge is incorporated as special functions inspired through the Sugawara Tank model template (Sugawara, 1979). In our prior work (Chadalawada et al., 2020), an automatic lumped conceptual rainfall-runoff model induction toolkit was developed using GP and the building blocks available in two modular modelling frameworks (FUSE and SUPERFLEX) were used as the components of hydrological insights.

Considering the uniqueness of the place is an important aspect of hydrological modelling (Beven, 2020). The use of distributed modelling concepts and flexible modelling frameworks are two available toolsets to incorporate the spatial heterogeneity into



345 the model building phase. Due to the limited success and higher-order complexity of fully distributed models, the semi-  
distributed modelling concept is used for the current study where a network of functionally distinguishable conceptual models  
from flexible modelling frameworks is developed to represent the watershed dynamics. As a result of the higher granularity  
and flexibility provided by the flexible modelling frameworks, even with a lumped application, one can try thousands of  
possible model architectures for a catchment of interest. This may rise to millions of possible model combinations in the  
350 context of semi-distributed modelling which makes it almost impossible to test them manually. Further, the selection of a  
model configuration without testing alternative model configurations would become highly subjective and may require  
considerable expert's knowledge and time. Therefore, we see a necessity to automate the model building phase to overcome  
these limitations. Hence, in this work, a novel model induction toolkit called Machine Induction Knowledge Augmented-  
System Hydrologique Asiatique (MIKA-SHA) is proposed to induce an optimal semi-distributed model for a catchment of  
355 interest. GP has been selected as the machine learning technique here due to its ability to optimize both model configuration  
and model parameters together. It is interesting to note that, most state of art GP utilizations in water resources (Oyebode and  
Adeyemo, 2014; Mehr et al., 2018), GP is still utilized as a short-term prediction mechanism which is analogous to ANN  
applications. In our contribution, we explore the full potential of GP by inducing fully-fledged rainfall-runoff models where  
the hydrological insights are introduced through the integration of process understanding by including model building  
360 components from existing flexible modelling frameworks into the function set of GP algorithm. Our earlier work  
(Chadalawada et al., 2020), presented the capacity of this modelling approach (ML-RR-MI) as a lumped conceptual model  
induction toolkit. In the current study, this framework is extended to induce semi-distributed rainfall-runoff models. As per  
the taxonomy defined in Karpatne et al. (2017), our framework falls under the hybrid TGDS category.

#### 4 MIKA-SHA

365 Chadalawada et al. (2020) introduced a new hydrologically informed rainfall-runoff model induction toolkit (ML-RR-MI)  
capable of developing lumped conceptual hydrological models utilizing model building components of FUSE and  
SUPERFLEX frameworks. Successful application of ML-RR-MI toolkit motivated the present research to extend its modelling  
capabilities towards distributed hydrological modelling. Hence, we have developed an automatic model induction toolkit for  
semi-distributed rainfall-runoff models. In the present contribution, a new function called "DISTRIBUTED" has been  
370 incorporated to the GP function set along with "FUSE", "SUPERFLEX" and other mathematical functions. The  
"DISTRIBUTED" function represents the semi-distributed models (GP individuals) within MIKA-SHA. The parse tree  
representation of the "DISTRIBUTED" function is shown in Fig. 1. As it can be seen, "DISTRIBUTED" function uses either  
"FUSE" or "SUPERFLEX" functions as its function arguments depending on the selected model inventory by the user. The  
length of the function arguments of "DISTRIBUTED" function depends on the number of Hydrological Response Units  
375 (HRUs) within the watershed. The last two arguments are the lag parameters which are used to route HRU's outflow into  
subcatchment outlet (Lag\_HRU) and subcatchment's outflow into catchment outlet (Lag\_Sub). Here, the routing module is

based on two-parameter Gamma distribution with shape parameter equals to 2.5. Nodes from depth = 2 to depth = maximum allowable tree depth, are the function arguments of either “FUZE” or “SUPERFLEX” functions.

R (R Core Team, 2018) programming language has been used to implement MIKA-SHA. Further, MIKA-SHA consists of a performance measures library including the majority of the widely adopted performance matrices (Chadalawada and Babovic, 2017). The multi-objective optimization scheme is founded on Non-dominated sorting genetic algorithm-II (NSGA-II) (Deb et al., 2002). The Pareto optimality concept in NSGA-II causes the output of the model induction stage of MIKA-SHA to be a set of non-dominated model configurations in terms of the chosen objective functions. To avoid subjectivity to the MIKA-SHA framework, a quantitative optimal model selection scheme has been added to the current version. The workflow diagram of the MIKA-SHA is given in Fig. 2. More details about each module (data preprocessing, model identification, model selection, and uncertainty analysis) are given in Sect. 5.

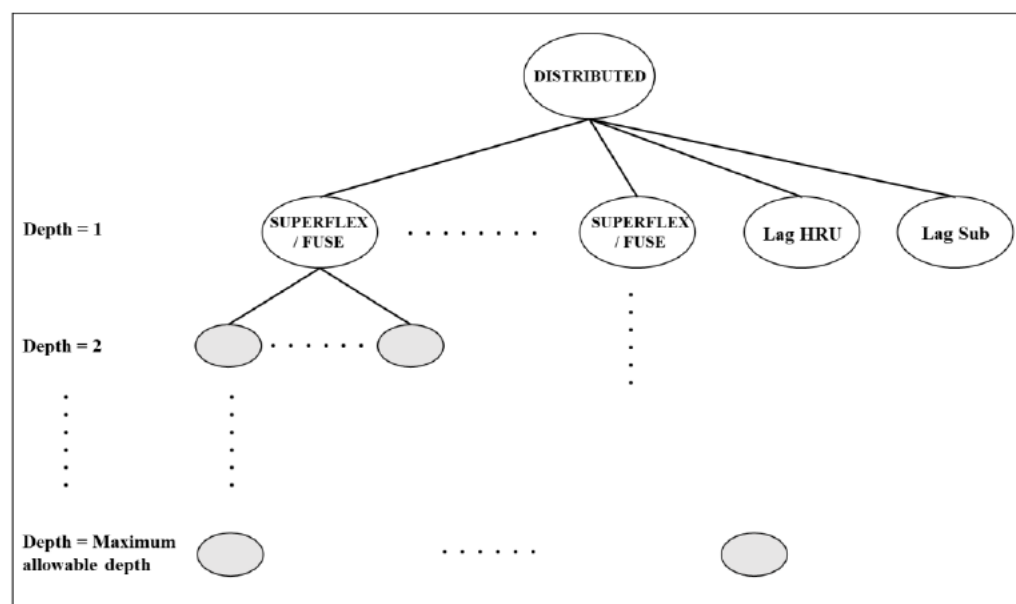

Figure 1: Parse tree representation of the DISTRIBUTED function in MIKA-SHA

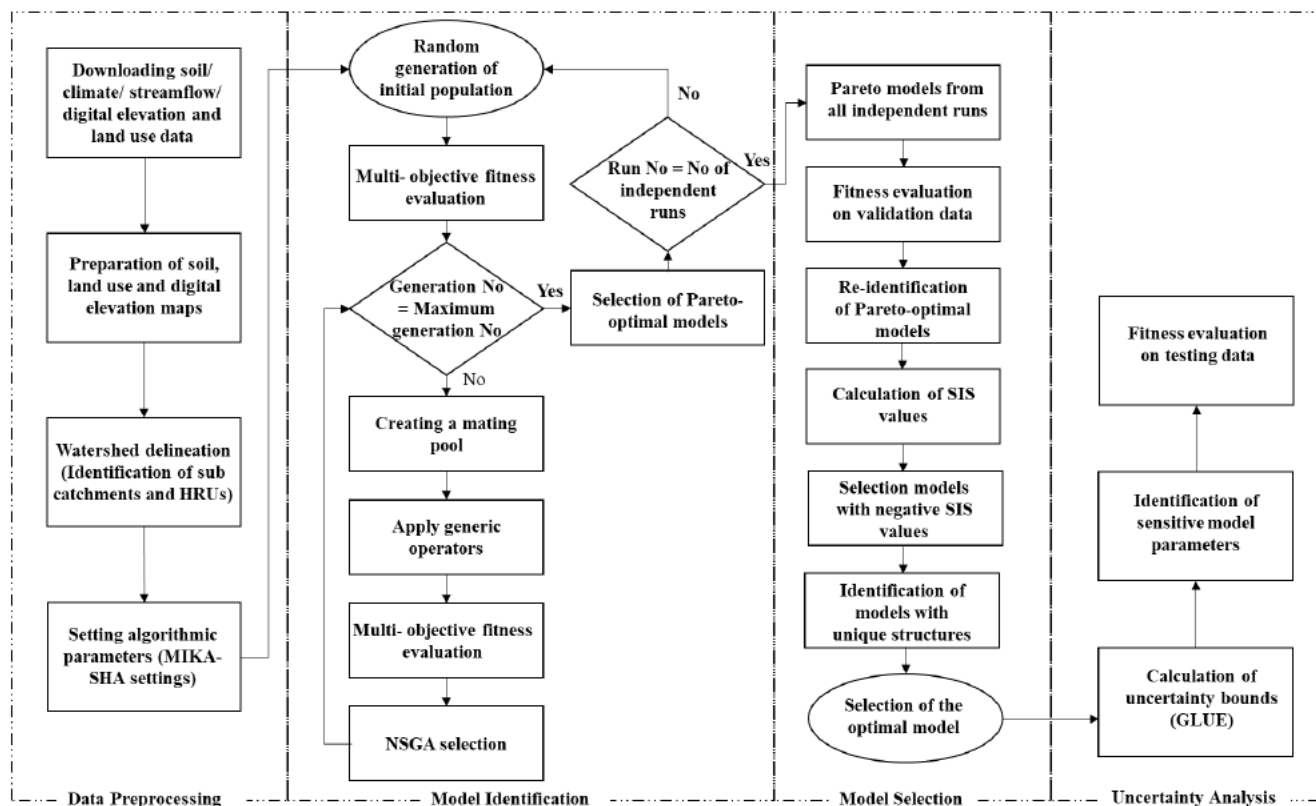

390 **Figure 2: Workflow diagram of MIKA-SHA**

## 5 Application of MIKA-SHA

### 5.1 Data Preprocessing

The Red Creek watershed near Vestry, Mississippi (Fig. 3) was selected to test the semi-distributed model induction capabilities of MIKA-SHA. Red Creek watershed is a Hydrologic Benchmark Network (HBN) station located in Eastern United States (Station 02479300). Basin details are summarized in Table 1. Soil and land use data of Red Creek catchment (resolution of 30 m x 30 m) were downloaded from the United States Department of Agriculture's (USDA's) Geospatial Data Gateway (USDA's Geospatial Data Gateway, 2020), whereas the Digital Elevation Data (DEM) at 30 m resolution were obtained from the Shuttle Radar Topography Mission (SRTM) data from United States Geological Survey (USGS) EarthExplorer (USGS EarthExplorer, 2020). Subsequently, soil, land use and DEM maps were prepared using QGIS software (QGIS, 2020). The SWAT+ plugin was used for the watershed delineation of Red Creek catchment. The whole watershed was divided into three subcatchments (Sub 1, Sub 2 and Sub 3) for the current application. HRUs were identified based on the topography of the area and three HRUs namely, Hill (slope band % > 10), Floodplain (slope position threshold = 0.1) and Plateau (slope band % < 10) were selected. The HRU details are given in Table 2.

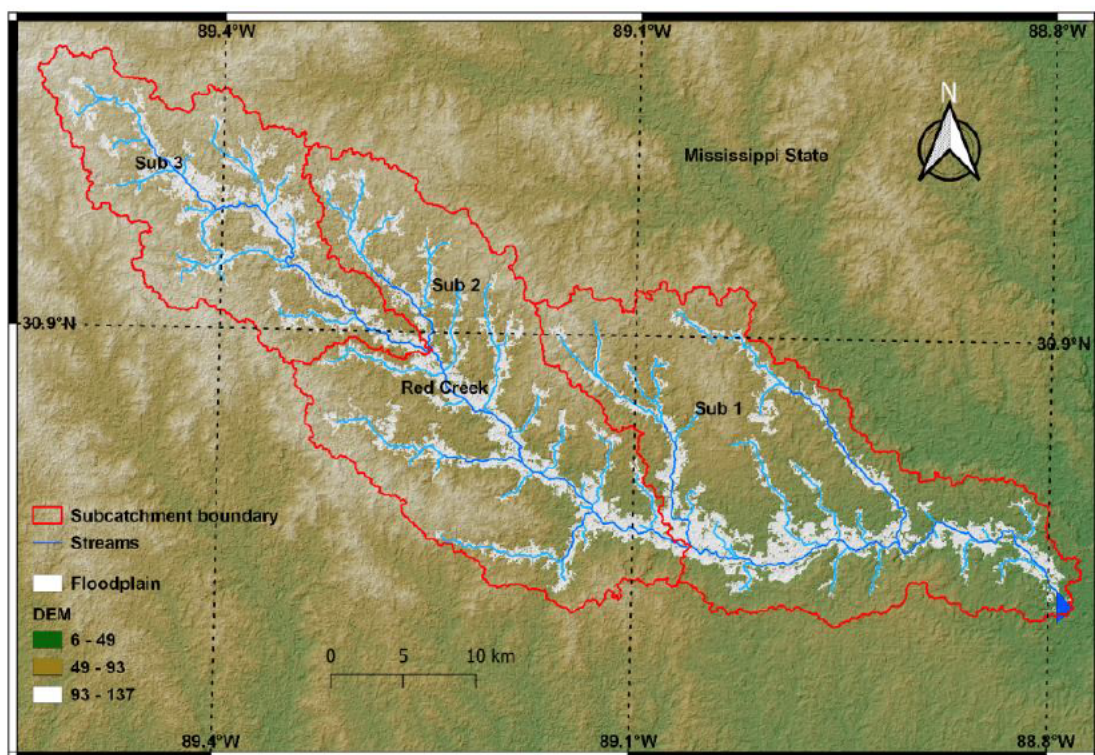

405

**Figure 3: Red Creek catchment, Vestry, Mississippi, United States** (map was generated through SWAT+ plugin in QGIS software using Shuttle Radar Topography Mission (SRTM) DEM data and USDA's Geospatial Data Gateway soil and land use data)

Eleven years (from 1/1/2004 to 31/12/2014) of forcing terms (precipitation, potential evaporation and temperature) and discharge data of Red Creek catchment were used for model spin-up (1/1/2004 – 31/12/2004), model calibration (1/1/2005 – 31/12/2009), model validation (1/1/2010 – 31/12/2012) and model testing (1/1/2013 – 31/12/2014). Catchment average daily data of potential evaporation, temperature and streamflow were downloaded from CAMELS dataset (Newman et al., 2015). The spatial distribution of daily precipitation data were considered and lumped at the subcatchment scale (three precipitation time series for the three subcatchments). Precipitation data were downloaded from the Daymet dataset (Daymet, 2020) which provides daily weather parameters (resolution: 1 km x 1 km), over North America. The time series diagrams of precipitation, potential evaporation, temperature and streamflow of Red Creek watershed are displayed in Fig. 4. Once the relevant data were processed, the user can set the algorithmic parameters of MIKA-SHA, which eventually decide the computation power and time required for the model induction. Table 3 summarizes the algorithmic setting of MIKA-SHA used in the current study.

410

415



420 **Table 1: Catchment details**

| Parameter                            | Details                                        |
|--------------------------------------|------------------------------------------------|
| Drainage area                        | 1144.2 km <sup>2</sup>                         |
| Outlet coordinates                   | 30.73611 <sup>o</sup> , -88.78111 <sup>o</sup> |
| Sub catchment area %                 | Sub 1 – 39.0%, Sub 2 – 37.9%, Sub 3 – 23.1%    |
| Floodplain/ Upslope                  | 23.6% / 76.4%                                  |
| Annual average discharge             | 1.755 mm/day                                   |
| Annual average potential evaporation | 3.689 mm/day                                   |
| Annual average temperature           | 19.57 °C                                       |
| Annual average precipitation         | 4.201 mm/day                                   |
| Average slope                        | 5.85 m/km                                      |
| Forest fraction                      | 0.89                                           |

**Table 2: Area percentages of topography based HRUs**

| Sub Catchment | Hill  | Floodplain | Plateau |
|---------------|-------|------------|---------|
| 1             | 10.4% | 22.4%      | 67.2%   |
| 2             | 15.3% | 23.3%      | 61.4%   |
| 3             | 14.3% | 26.1%      | 59.6%   |

## 5.2 Model Identification

At the model identification stage, a GP based optimization framework optimizes both model configuration and associated  
 425 parameters of the GP individuals simultaneously. Here, the optimization algorithm is repeated for a user-specified number of  
 iterations (independent runs) to cover the solution space to a greater extend. The output of the model identification stage  
 consists of a bunch of non-dominated models (Pareto-optimal models) based on the selected objective criteria. More details  
 about the basic steps involved at this stage are given in Chadalawada et al. (2020).

As mentioned, MIKA-SHA relies on a multi-objective optimization framework at model identification stage, using desired  
 430 objective functions from the objective function library. Having said that, identification of the best performing model from  
 Pareto front of non-dominated solutions for a watershed of interest is not a trivial matter. The explanatory power of the  
 performance measure used to assess the prediction accuracy of model simulations has a direct impact on the optimal model  
 selection (Chadalawada and Babovic, 2017). In the present case, four objective functions are selected from the objective  
 function library of MIKA-SHA to assess the fitness of GP derived individuals in model identification stage. The selected four  
 435 objective functions are sensitive to different regions of measured and simulated runoff signatures and their details are given in  
 Table 4.





**Table 3: Algorithmic settings of MIKA-SHA**

| Option                                        | Setting                                           |
|-----------------------------------------------|---------------------------------------------------|
| Number of independent Runs                    | 20                                                |
| Size of population                            | 2000                                              |
| Termination criteria                          | Generation number = 50                            |
| The randomized method used for initialization | Ramped Half and half                              |
| Special functions/ Mathematical functions     | SUPERFLEX, FUSE, DISTRIBUTED/ +, -, /, *          |
| Input variables – SUPERFLEX                   | Precipitation, temperature, potential evaporation |
| Input variables – FUSE                        | Precipitation, potential evaporation              |
| Dependent variable                            | Streamflow                                        |
| Number of objective functions used            | 4                                                 |
| Normalized range of constants                 | 0 to 1                                            |
| Depth of parse trees- initial/ maximum        | SUPERFLEX – 3/5, FUSE – 2/4                       |
| The mating pool selection strategy            | Tournament selection with 4 competitors at once   |
| Genetic operator probability: mutation        |                                                   |
| Constant/ Tree/ Separation/ Node              | 0.5/0.5/0.3/0.3                                   |
| Genetic operator probability: crossover       | 0.7                                               |
| Count of CPUs used for parallel computation   | 40 units                                          |
| Level of parallel computation                 | Performance evaluation level                      |

440 MIKA-SHA was tested on the Red Creek basin data to derive representative semi-distributed model architectures for the watershed. Rainfall-runoff models were induced using SUPERFLEX and FUSE libraries independently along with the same multi-objective optimization scheme with topography based HRUs.

### 5.3 Model Selection

445 Model selection stage starts with the best models of each independent run (front 1 models of final generation) derived through the GP framework at the model identification stage. The optimal model selection process is streamlined as follows.

1. Performance evaluation using the same four objective functions on validation data (2010/01/31-2012/12/31) for all identified models from the model identification stage.
2. Re-identification of Pareto-optimal models based on both calibration and validation fitness values.
3. Calculation of Standardized Signature Index Sum of each Pareto-optimal model.



#### 450 **Standardized Signature Index Sum (SIS)**

The Standardized Signature Index Sum value (Ley et al., 2016) is a relative performance measure which quantifies how well a model captures the observed flow duration curve (FDC) relative to the other competitive models. Models with negative SIS values indicate better than average performance in capturing observed FDC and vice versa. In SIS calculation, both observed and simulated FDCs are divided into four flow regimes based on flow exceeding probabilities and calculate the absolute difference in observed and simulated cumulative discharges in each region. Then, four separate Z-score values (representing 4 regions) are assigned to each model based on the mean and standard deviation of all models considered. The algebraic sum of those four Z-score values becomes the SIS value of the model.

$$Z_{sa} = \frac{|x_{sa}| - \bar{x}_a}{\sigma_a} \quad (5)$$

$$SIS_a = Z_{sFHV} + Z_{sFMV} + Z_{sFMS} + Z_{sFLV} \quad (6)$$

460 where  $|x_{sa}|$  : modulus of the signature index where, s: model, a: FDC signature based on Flow Exceeding Probability (FEP) (FHV: FEP less than 2%, FMV: FEP between 2% and 20%, FMS: FEP between 20% and 70%, FLV: FEP greater than 70%) and x: value,  $\bar{x}_a$  and  $\sigma_a$  : average and standard deviation of  $|x_{sa}|$ , Z : standard score.

4. Selection of Pareto-optimal models with SIS scores below zero over the calibration and validation period.
- 465 5. Identify unique model structures (hereinafter referred to as competitive models) from the models in step 4. If there is more than one model with the same model structure, the model with the most negative SIS value is selected.
6. Quantitative selection of the optimal model to represent catchment dynamics based on three relative measures: Cross sample entropy value (Cross-SampEn), Dynamic Time Warping (DTW) distance and the number of associated model parameters. Competitive models are ranked according to each measure and the model with the lowest sum up rank is selected as the optimal model for the watershed of concern.
- 470

#### *Cross sample entropy value (Cross-SampEn)*

Cross-SampEn value is a derivation from the commonly used Sample Entropy value (Richman and Moorman, 2000). Sample Entropy is a complexity measure of data series which has its origin in information theory. Sample Entropy value gives an idea about the complexity of the data series based on the information content in a mathematical way. Cross-SampEn value also follows the same concept but is used to measure the correlation between two series by matching patterns from one series with another. A low Cross-SampEn value indicates that the two series are more similar to each other. More details about Cross-SampEn can be found in Delgado-Bonal and Marshak, (2019).



#### 480 *Dynamic Time Warping (DTW) distance*

Dynamic Time Warping (Sakoe and Chiba, 1978) is a similarity measure between two time series which includes warping of their time axes to find the optimal temporal alignment between the two. DTW distance is derived as an alternative to the commonly used Euclidean distance. Two identical time series with a small-time shift may ending up with a large Euclidean distance and may consider them as two dissimilar time series. The DTW method captures them as two similar time series as it  
485 ignores the shift in the time axes. A low DTW distance indicates more similarity between the two time series compared. Details and applications of the DTW method can be found in Salvador and Chan (2007), Giorgino (2009) and Vitolo (2015).

#### *Number of model parameters*

This measure simply calculates the number of associated model parameters of each competitive model and rank them in  
490 ascending order.

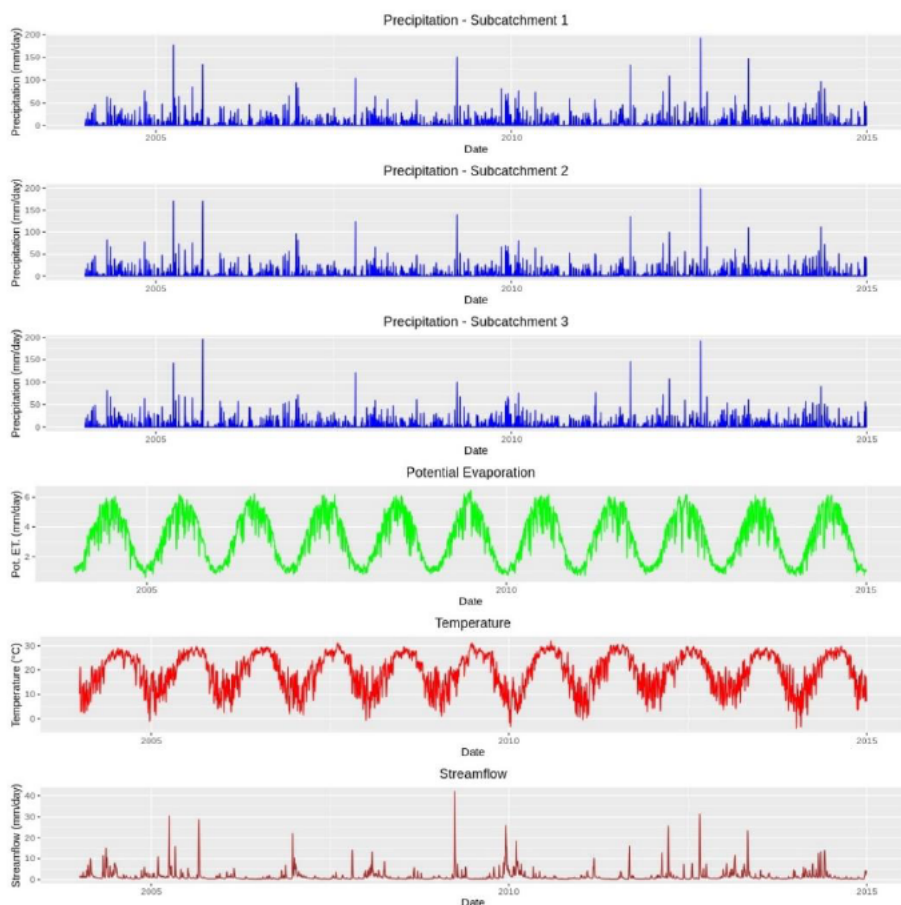

**Figure 4: Forcing terms and streamflow data of Red Creek catchment**



**Table 4: Objective functions used at the model identification stage**

| Name                                                               | Equation                                                                                                                                                                                                                                                               | Sensitivity      | Optimum |
|--------------------------------------------------------------------|------------------------------------------------------------------------------------------------------------------------------------------------------------------------------------------------------------------------------------------------------------------------|------------------|---------|
| Volumetric Efficiency<br>(VE) (Criss and Winston,<br>2008)         | $VE = 1 - \frac{ \sum_{t=1}^N (Q_{ot} - Q_{st}) }{\sum_{t=1}^N Q_{ot}}$ <p>N: Time steps, <math>Q_{ot}</math>: Observed streamflow, <math>Q_{st}</math>:<br/>Simulated streamflow</p>                                                                                  | Water balance    | 1       |
| Kling-Gupta Efficiency<br>(KGE) (Gupta et al., 2009)               | $KGE = 1 - \sqrt{(r - 1)^2 + (\alpha - 1)^2 + (\beta - 1)^2}$ <p>r: Linear correlation coefficient, <math>\alpha = \frac{\sigma_s}{\sigma_o}</math>, <math>\beta = \frac{\mu_s}{\mu_o}</math>,<br/><math>\sigma</math>: Standard deviation, <math>\mu</math>: Mean</p> | Flow variability | 1       |
| Nash-Sutcliffe Efficiency<br>(NSE) (Nash and Sutcliffe,<br>1970)   | $NSE = 1 - \frac{\sum_{t=1}^N (Q_{ot} - Q_{st})^2}{\sum_{t=1}^N (Q_{ot} - \overline{Q_{ot}})^2}$ <p><math>\overline{Q_{ot}}</math>: Mean of observed discharge values</p>                                                                                              | High flows       | 1       |
| Log Nash-Sutcliffe<br>Efficiency (logNSE)<br>(Krause et al., 2005) | $\logNSE = 1 - \frac{\sum_{t=1}^N (\ln Q_{ot} - \ln Q_{st})^2}{\sum_{t=1}^N (\ln Q_{ot} - \ln \overline{Q_{ot}})^2}$ <p>ln: Natural logarithm</p>                                                                                                                      | Low flows        | 1       |

#### 495 5.4 Uncertainty Analysis

Once the optimal model was identified for the catchment of interest its uncertainty and sensitivity analysis were performed using Generalized Likelihood Uncertainty Estimation (GLUE) (Beven and Binley, 1992) as described below.

- A random subset of model parameters of the selected optimal model structure is changed uniformly within their parameter range (in this case between 0 and 1 as all parameter ranges are normalized within MIKA-SHA framework) while keeping the remaining model parameters at their calibrated values. NSE is used as the likelihood estimation. If the model parameter set provides an NSE value greater than the likelihood threshold, (in the current study NSE = 0.6) the parameter set, its NSE value and the simulated discharge are recorded (known as behavioural models).

500



- Repeat the above step until the number of behavioural models reaches a user-defined value. Five thousand behavioural models are identified in the current study.
- 505 • For each time step, simulated discharge values of all behavioural models are sorted in ascending order. Then, a weight is assigned to each model (NSE value itself is used as the weight). Finally, the Cumulative Probability Distribution Function (CDF) of the weights is calculated at each time step.
- For each time step, a relationship diagram is obtained by taking CDF as the x-axis and simulated discharge at the y-axis. From the diagram, corresponding simulated discharge values of 95% and 5% quantile of CDF are selected as  
510 the upper and lower bounds of the 90% confidence band.
- Percentage of observed discharge values (both in calibration and validation period) which fall within the 90% confidence band is used to measure the uncertainty estimation capability of the selected optimal model.
- If the uncertainty estimation capabilities are satisfactory, the model performance of the optimal model is tested for an independent time frame (2013/01/01 to 2014/12/31) which is not used in model selection or identification stages. If  
515 the uncertainty estimation is not satisfactory, then, all the above steps are to be repeated with the next best competitive model.
- Sensitivity scatter plots are drawn for each model parameter using the parameter values of behavioural models. The shape of the scatter plot (the x-axis – normalized parameter range, the y-axis – NSE values) is used to identify the degree of sensitivity of each model parameter.

## 520 **6 Results**

Three topography based HRUs were identified for the Red Creek catchment (Table 2). Both SUPERFLEX and FUSE model building component libraries were implemented independently to induce representative semi-distributed rainfall-runoff models for the catchment. Results obtained through the application of MIKA-SHA with topography based HRUs are presented in this section.

### 525 **6.1 MIKA-SHA Models induced using SUPERFLEX Building Blocks**

Adhering to the methodology given in Sect. 5, three competitive models were identified. Their relative rank scores are presented in Table 5. Hence, model M2 (hereinafter referred to as SUPERFLEX\_TOPO\_M2) was identified as the optimal model architecture capturing the basin dynamics of Red Creek watershed. The model architecture of SUPERFLEX\_TOPO\_M2 is given in Fig. 5. Hillside structure of the SUPERFLEX\_TOPO\_M2 consists of two reservoirs connected in parallel: a fast-reacting soil reservoir (FR) and a riparian reservoir (RR). The model structure also consists of two half-triangular delay  
530 functions. The discharge of the FR incorporates a power function relationship with its storage. The model structure representing the floodplain differs from the hillside structure by the inclusion of a snow reservoir (WR). Plateau area is based on one



reservoir configuration with an unsaturated soil reservoir (UR). The discharge storage relationship of UR is governed by the modified logistic function. Further, a lag function is connected with the base flow of the UR.

535 The performance matrix for calibration, validation and testing periods of SUPERFLEX\_TOPO\_M2 is given in Table 6. The high values of all four absolute performance measures suggest that SUPERFLEX\_TOPO\_M2 is competent in capturing the catchment dynamics of Red Creek basin. The model shows consistent behaviour throughout the calibration, validation and testing periods. Hence, we may expect no overfitting issues with training data (calibration data). Figure 6 illustrates the simulated hydrograph of SUPERFLEX\_TOPO\_M2 along with the observed hydrograph of the watershed. As can be seen, the simulated discharge signature matches the observed discharge signature reasonably well. It is noteworthy that SUPERFLEX\_TOPO\_M2 underestimates the peak discharges in some instances. Figure 7 illustrates the observed FDC of the watershed and the simulated FDCs of SUPERFLEX\_TOPO\_M2 for calibration, validation and testing periods. As it can be observed modelled FDCs nearly follow the measured FDC both in medium and high flow regimes but diverge slightly at low flow regime. Uncertainty analysis reveals that 75% of the observed discharge data lie within the 90% uncertainty bounds of SUPERFLEX\_TOPO\_M2. The sensitivity scatterplots of the model parameters of SUPERFLEX\_TOPO\_M2 along with the model parameters details are provided in the Appendix.

**Table 5: Optimal model selection details (Library – SUPERFLEX)**

| Model | Rank         |              |                 |     |
|-------|--------------|--------------|-----------------|-----|
|       | Cross Sample | Dynamic Time | Number of Model | Sum |
|       | Entropy      | Warping      | Parameters      |     |
| M2    | 2            | 1            | 2               | 5.0 |
| M3    | 3            | 2            | 1               | 6.0 |
| M1    | 1            | 3            | 3               | 7.0 |

**Table 6: Performance matrix of SUPERFLEX\_TOPO\_M2**

| Efficiency  | VE    | KGE   | NSE   | logNSE |
|-------------|-------|-------|-------|--------|
| Period      |       |       |       |        |
| Calibration | 0.748 | 0.911 | 0.922 | 0.845  |
| Validation  | 0.724 | 0.932 | 0.919 | 0.838  |
| Testing     | 0.759 | 0.933 | 0.879 | 0.881  |

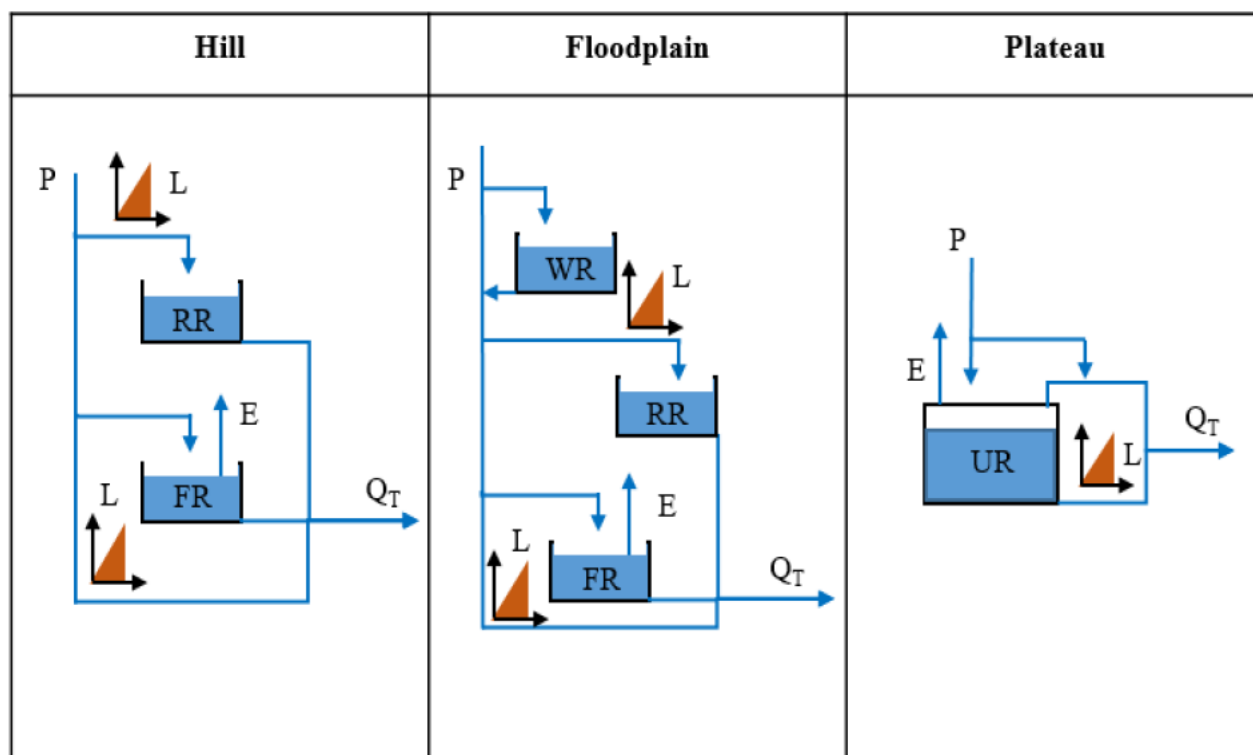

550

**Figure 5: SUPERFLEX\_TOPO\_M2 model configuration** (P: precipitation, E: evaporation,  $Q_T$ : total discharge, WR: snow reservoir, RR: riparian reservoir, FR: fast-reacting soil reservoir, UR: unsaturated soil reservoir, L: half-triangular lag function)

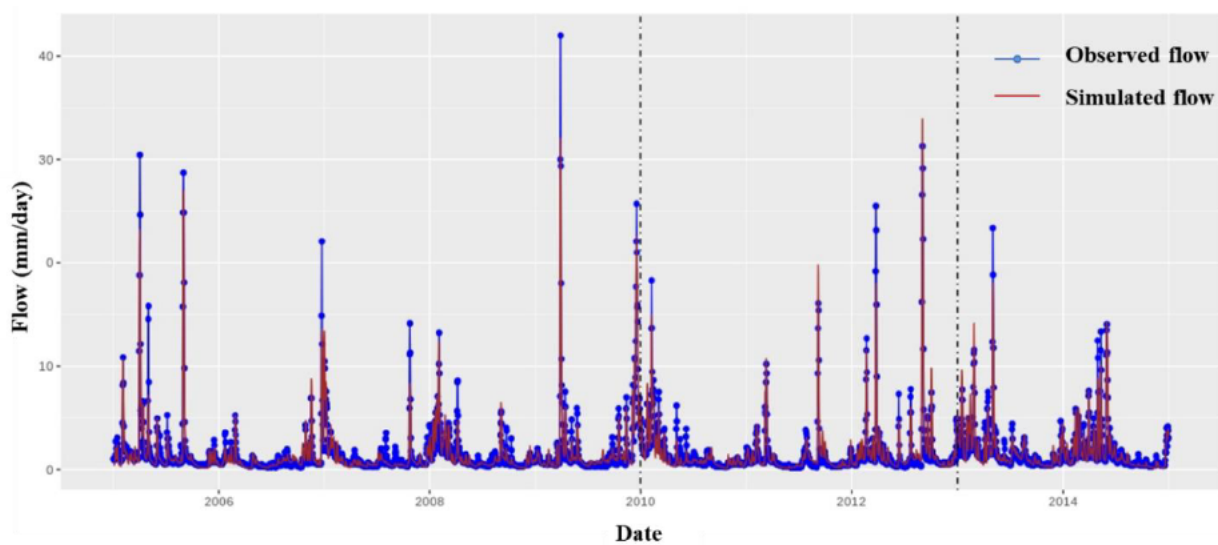

555 **Figure 6: Hydrograph of SUPERFLEX\_TOPO\_M2**

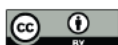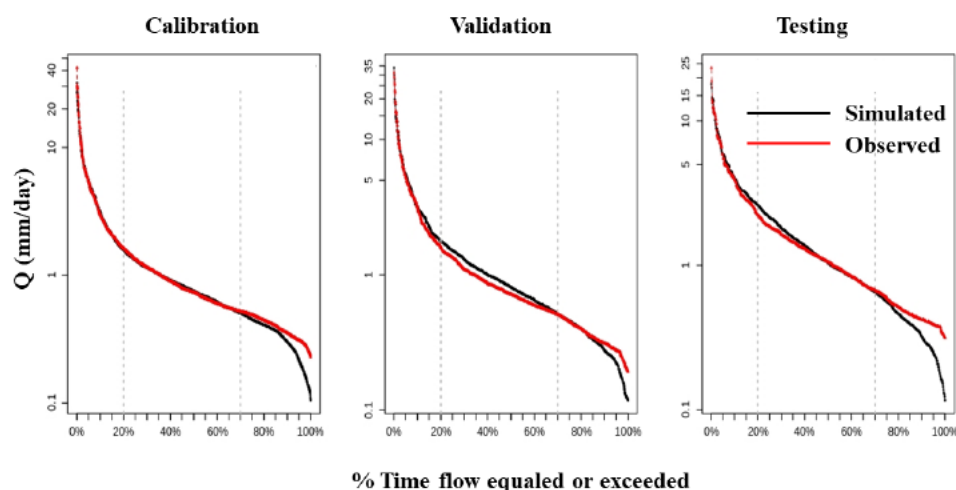

**Figure 7: Flow Duration Curves of SUPERFLEX\_TOPO\_M2**

Other than the inclusion of a WR in the floodplain model structure, both floodplain and hillside model structures share the same model architecture. Although WR is present, it is activated only if the temperature falls below a certain threshold value (calibrated value equals to  $2^{\circ}\text{C}$ ). During all 11 years of data used in the current study only less than 1% of time temperature falls below this threshold value. Hence, the effect of WR in floodplain model structure may be considered as negligible. Model structural components and the calibrated values suggest that the runoff generation in both hillside and floodplain areas respond quickly to precipitation. This quick response is reasonable in both areas due to the higher slopes at hillside and widening of the river across the floodplain in high flow events. Further, the main soil type in the floodplain area of Red Creek catchment belongs to Smithton soil series which is characterized as soil with slow permeability and seasonally high-water table (Official Soil Series Descriptions, 2020). This may result in fast discharge generation dynamics, such as saturation excess overland flow. The constitutive function of the FR in both hillside and floodplain structure is the power function. This may help to capture the non-linear response of runoff generation. On the other hand, in plateau areas (around half of the total catchment area), one can expect higher residence times as the slopes are milder. This may lead to a delayed response in discharge to its forcing and may allow water to infiltrate more into subsurface layers. On top of that, the majority of the plateau area consists with McLaurin and Heidal soil types, which are characterized as sandy, well-drained soil types with moderate permeabilities (Official Soil Series Descriptions, 2020). Therefore, having an UR with a delayed base flow component as the plateau area model structure in SUPERFLEX\_TOPO\_M2 is meaningful. Finally, the choice of modified logistic function as the constitutive function may help the plateau area model structure to capture the threshold like behaviours (e.g. saturation excess overland flow) in catchment dynamics.

Out of the 34 model parameters included in SUPERFLEX\_TOPO\_M2, 10 model sensitive parameters can be recognized by analysing the shapes of sensitivity scatterplots. They are  $D_R$  and  $D_S$  in floodplain model structure,  $Beta_{Qq_{UR}}$ ,  $C_e$ ,





Smax\_UR, D\_S, mu\_Qq\_UR and K\_Qb\_UR in plateau area model structure and two lag parameters (Lag\_HRU and Lag\_Sub). Please refer to the Appendix for more details about model parameters. Majority of the model sensitive parameters are connected with plateau area model structure. This is acceptable as the plateau area has the largest spatial coverage in terms of the catchment area of Red Creek catchment under topography based HRU classification. As reported earlier, obtaining a high percentage of measured data within the uncertainty bands (75%) suggests that the SUPERFLEX\_TOPO\_M2 is capable of estimating the total output uncertainty satisfactorily.

## 6.2 MIKA-SHA Models induced using FUSE Building Blocks

Application of MIKA-SHA with FUSE library resulted in five competitive model structures using topography based HRU classification. The relative rank scores are given in Table 7. Model M1 (hereinafter referred to as FUSE\_TOPO\_M1) was selected as the optimal model as it gave the lowest sum up rank. FUSE\_TOPO\_M1's model configuration is shown in Fig. 8. Both the hillside model structure and the floodplain model structure have the same upper- and lower-layer architectures identical to ARNO-VIC model with a single state upper soil reservoir and a fixed size base flow reservoir. Plateau area model structure incorporates a lower zone configuration like ARNO-VIC model and an upper zone configuration similar to SACRAMENTO model with the upper layer broken up into tension and free storages. Surface flow from all three model structures is developed as saturation-excess overland flow and described using the flux equations in FUSE parent model TOPMODEL. Both hillside and floodplain model structures have the same percolation mechanism which allows water to percolate from the field capacity to saturation and described using the flux equations of PRMS model, whereas in plateau area percolation is controlled by the moisture amount in the saturated zone as in SACRAMENTO model. A root weighting evaporation model is used both in floodplain and plateau area model structures, while a sequential evaporation model is used in hillside model structure. Interflow is allowed only in the plateau area model structure and the routing is allowed only in hillside model structure.

**Table 7: Optimal model selection details (Library – FUSE)**

| Model | Rank                 |                      |                            | Sum  |
|-------|----------------------|----------------------|----------------------------|------|
|       | Cross Sample Entropy | Dynamic Time Warping | Number of Model Parameters |      |
| M1    | 2                    | 1                    | 1.5                        | 4.5  |
| M4    | 4                    | 2                    | 1.5                        | 7.5  |
| M6    | 1                    | 3                    | 6                          | 10.0 |
| M2    | 3                    | 4                    | 5                          | 12.0 |
| M3    | 5                    | 5                    | 3                          | 13.0 |
| M5    | 6                    | 6                    | 4                          | 16.0 |

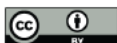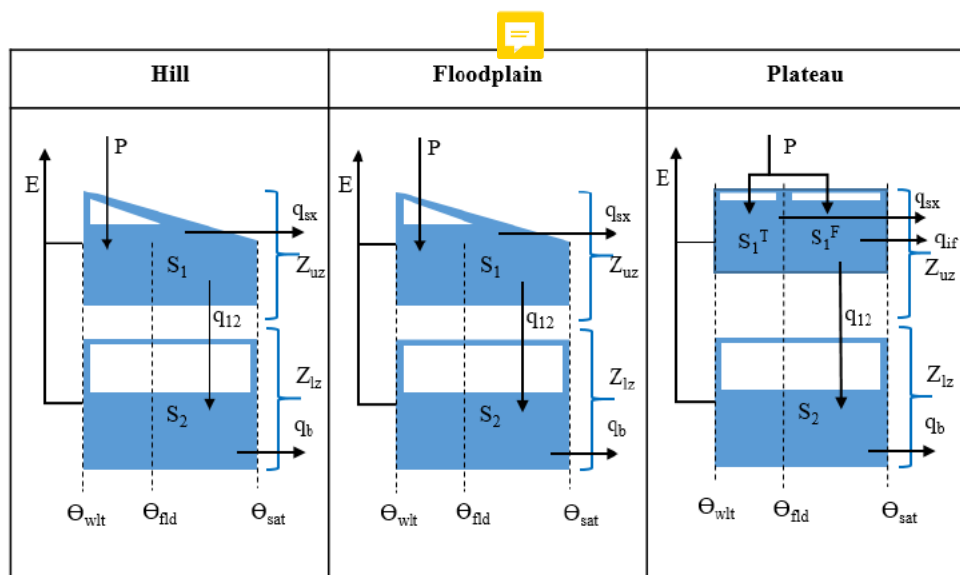

600

**Figure 8: FUSE\_TOPO\_M1 model configuration** (P: precipitation, E: evaporation,  $q_b$ : base flow,  $q_{sx}$ : surface flow,  $q_{12}$ : percolation,  $q_{if}$ : interflow,  $Z_{uz}$  and  $Z_{lz}$ : depth of unsaturated zone and saturated zone,  $S_1$  and  $S_2$ : total water content in the unsaturated zone and saturated zone,  $S_1^F$ : free water content in the unsaturated zone,  $S_1^T$ : tension water content in the unsaturated zone,  $\Theta_{wit}$ : soil moisture at the wilting point,  $\Theta_{fld}$ : soil moisture at field capacity,  $\Theta_{sat}$ : soil moisture at saturation)

605

The performance matrix of FUSE\_TOPO\_M1 is given in Table 8. According to the high efficiency values, simulated discharge of FUSE\_TOPO\_M1 shows a good match with the observed discharge data and a consistent performance throughout the calibration, validation and testing periods. Further, simulated hydrograph (Fig. 9) can capture the observed flow signature of the watershed reasonably well. Simulated FDCs of FUSE\_TOPO\_M1 are presented in Fig. 10 along with observed FDC of the catchment. The simulated FDC at the calibration stage almost exactly follows the observed FDC and deviates slightly in validation and testing periods. Sensitivity scatterplots of model parameters of FUSE\_TOPO\_M1 and model parameter details are given in the Appendix. Ninety-four percent (94%) of the measured data fall between the 90% uncertainty bands of FUSE\_TOPO\_M1.

610

**Table 8: Performance matrix of FUSE\_TOPO\_M1**

| Efficiency  | VE     | KGE   | NSE   | logNSE |
|-------------|--------|-------|-------|--------|
|             | Period |       |       |        |
| Calibration | 0.785  | 0.967 | 0.935 | 0.896  |
| Validation  | 0.749  | 0.870 | 0.912 | 0.891  |
| Testing     | 0.744  | 0.826 | 0.891 | 0.882  |

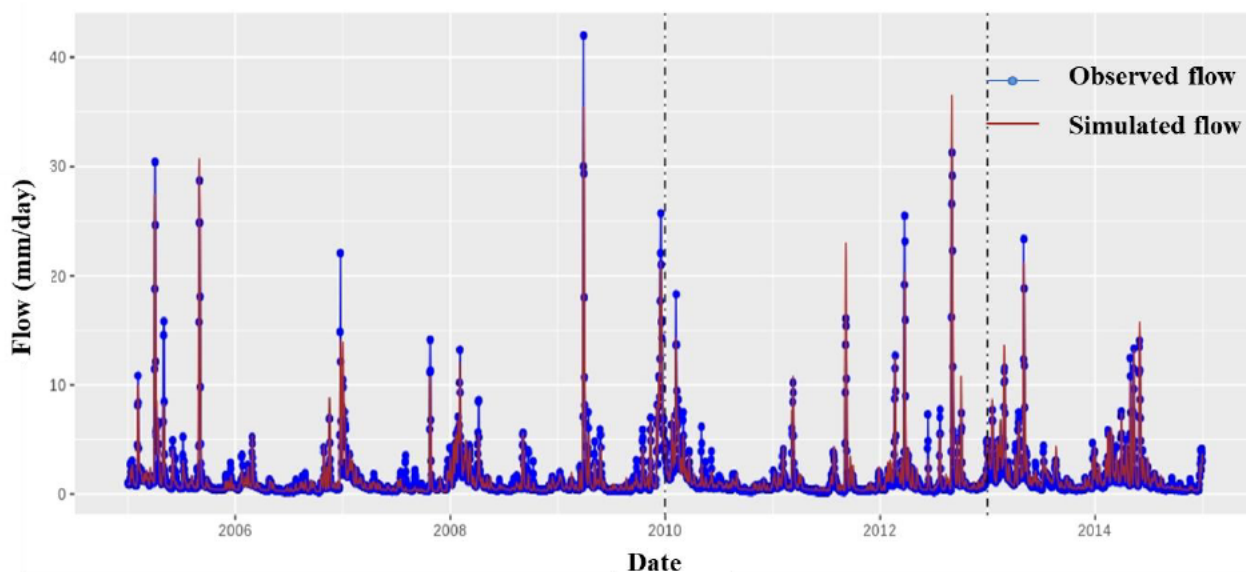

615 **Figure 9: Hydrograph of FUSE\_TOPO\_M1**

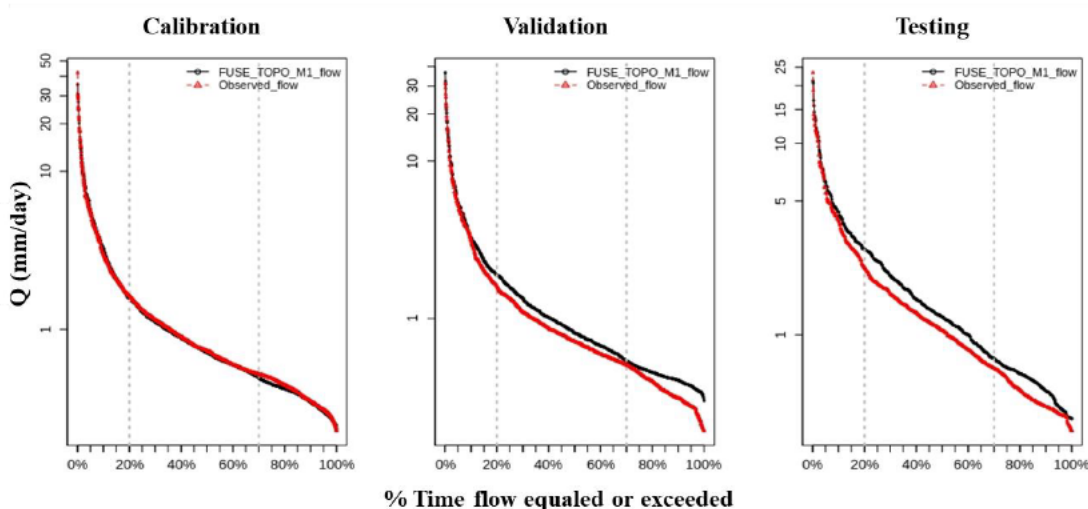

**Figure 10: Flow Duration Curves of FUSE\_TOPO\_M1**

It is interesting to note that, as in SUPERFLEX\_TOPO\_M2, both floodplain and hillside model structures are based on the same model configuration, whereas plateau area model structure has a different model configuration in FUSE\_TOPO\_M1's model architecture. This demonstrates the consistency of MIKA-SHA in capturing the similarities in runoff generation even with different model inventory libraries. Hillside model structure shows a delayed response compared to the floodplain as it allowed routing using two-parameter Gamma function. In the plateau area model structure, more subsurface type response in runoff generation can be expected as it incorporates an interflow component and its percolation is controlled by the moisture



amount in the saturated zone. This goes in line with the soil properties of the Red Creek catchment. The lower layer  
625 architectures of all three model components of FUSE\_TOPO\_M1 include non-linear storages functions which may help  
capture the non-linear catchment dynamics of Red Creek catchment. Out of the 33 model parameters only 5 parameters can  
be identified as sensitive parameters. They are maxwater\_2, baserte and qb\_power in plateau model structure and the two lag  
parameters (Lag\_HRU and Lag\_Sub). This demonstrates a lesser dependency on model parameters compared to the total  
model performance in semi-distributed modelling owing to the large number of model parameters. FUSE\_TOPO\_M1 results  
630 in high value (94%) for the percentage of measured streamflow data within the confidence interval bands and hence shows a  
significant capability of estimating associated uncertainty. 

Results of this study, such as achieving high efficiency values for the absolute performance measures and obtaining a good  
visual equivalent between measured and modelled hydrographs suggest that topography of the catchment may have a strong  
impact on runoff generation. Further, MIK  HA shows the capability of capturing catchment similarities even when using  
635 different model building blocks.

One of the major issues with machine learning models is the overfitting of the model to its training dataset. The consistent  
performances over the calibration, validation and testing periods of all selected optimal models through MIKA-SHA show no  
such issues in this case. Deterministic semi-distributed modelling would require/ rely a large number of model parameters, by  
comparison, a smaller number of model parameters which are sensitive towards the total model performance. Further, the  
640 values of two lag parameters associated with “DISTRIBUTED” function (Lag\_HRU and Lag\_Sub) were found to be crucial  
in achieving high model performances. As the research findings of MIKA-SHA demonstrate a logical match with previously  
reported research findings and fieldwork insights, it may be safe to assume that MIKA-SHA is capable of handling equifinality  
phenomenon satisfactorily (i.e. selected optimal models perform for the right reasons). Additionally, the quantitative model  
selection scheme of MIKA-SHA ensures the selected optimal model has the appropriate complexity to describe the dominant  
645 runoff generation processes of the catchment instead of selecting an optimal model only based on model parsimony.

## 7 Conclusions

In this contribution, we introduce Model Induction Knowledge Augmented-System Hydrologique Asiatique (MIKA-SHA) for  
learning semi-distributed models where the spatial distributions of catchment properties and climate variables are taken into  
account. MIKA-SHA utilizes the existing hydrological knowledge to guide the machine learning algorithm which eventually  
650 results in physically meaningful hydrological models that can be readily interpretable by domain specialists. In the current  
study, background hydrological knowledge is blended with the machine learning algorithm through the model building  
components of flexible rainfall-runoff modelling frameworks.



Results of this study indicate that the consideration of spatial distributions of forcing data and catchment properties gives more meaningful insights regarding the environmental dynamics occurring within the watershed. The consistency demonstrated by the MIKA-SHA in capturing the similar runoff dynamics across different model inventories shows that the toolkit is smart enough to mine knowledge from data which makes it feasible to depend on the induced model configurations beyond just statistical confidence. The unique and distinct feature of MIKA-SHA is that it could be coupled with any internally coherent collection of building blocks representing the elements of hydrological knowledge and use genetic programming to optimize both model architecture and model parameters simultaneously. This approach enables hydrologists to utilize flexible modelling frameworks to their full potential by trying many hypotheses before selecting an optimal model. MIKA-SHA is expected to be most valuable in circumstances where there may be a lack of experimental insights regarding the catchment of interest or human expert's knowledge.

We recognize the potential offered by machine learning algorithms towards hydrological modelling. However, simplistic black box type data-driven models may contribute to the development of accurate yet pointless models with severe difficulties with interpretation may not serve towards the advancement of hydrological knowledge. Thus, the most promising way forward would be through the integration of existing hydrological knowledge with learning algorithms to induce more generalizable and physically consistent models. This was the motivation behind the development of the proposed MIKA-SHA framework which has been founded on both machine learning and hydrological theories. Therefore, we expect this work will strengthen the link between two leading, but historically, largely independent communities in water resource science and engineering: those working with physics-based process simulation modelling, and those working with machine learning. Finally, we expect more research studies on theory-guided machine learning to be directed towards the knowledge mining and automated model building in hydrological modelling.

## Appendix

**Table A1: SUPERFLEX\_TOPO\_M2's model parameter details**

| Model parameter                             | Unit               | Range     | Symbol          | Model structure |       |       |
|---------------------------------------------|--------------------|-----------|-----------------|-----------------|-------|-------|
|                                             |                    |           |                 | Hill            | Flood | Plat. |
| K in $Q = K*(S)$ from RR                    | $t^{-1}$           | 5e-2 - 4  | K_Qq_RR         | 0.050           | 0.050 | -     |
| Fraction of inflow to RR                    | No units           | 0 - 1     | D_R             | 0.593           | 0.132 | -     |
| K in $Q = K * S^\alpha$                     | $mm^\alpha t^{-1}$ | 1e-4 - 10 | K_Qq_FR         | 0.019           | 0.019 | -     |
| Smoothing parameter for Poten. Evapo. of FR | No units           | 1e-2 - 2  | m_E_FR          | 1.943           | 1.943 | -     |
| $\alpha$ in $Q = K * S^\alpha$              | No units           | 1e-1 - 10 | $\alpha$ _Qq_FR | 2.369           | 2.226 | -     |
| Portion of inflow from Qq to Qb             | No units           | 0 - 1     | D_F             | 0.657           | 0.633 | -     |



|                                             |                                     |            |           |       |       |                    |
|---------------------------------------------|-------------------------------------|------------|-----------|-------|-------|--------------------|
| Evaporation multiplying parameter           | No units                            | 1e-1 - 3   | Ce        | 2.060 | 2.536 | 1.418              |
| Base of rising limb                         | t                                   | 1 - 10     | Tlag      | 8.174 | 9.696 | 10                 |
| Portion of rainfall to FR                   | No units                            | 0 - 1      | D_S       | 0.850 | 0.802 | 0.012              |
| Correction factor for snow                  | No units                            | 5e-1 - 5   | Cp_WR     | -     | 0.711 | -                  |
| Melt rate smoothing parameter               | mm                                  | 1e-2 - 2   | m_Q_WR    | -     | 1.129 | -                  |
| Potential melt rate coefficient             | mm °C <sup>-1</sup> t <sup>-1</sup> | 1e-2 - 10  | Kq_WR     | -     | 4.514 | -                  |
| Snow forming temperature                    | °C                                  | 0 - 10     | Tp_WR     | -     | 2.051 | -                  |
| Snow melting temperature                    | °C                                  | 0 - 4      | Tm_WR     | -     | 0.827 | -                  |
| Runoff coefficient parameter                | No units                            | 1e-3 - 10  | β_Qq_UR   | -     | -     | 9.500              |
| Maximum reservoir capacity                  | mm                                  | 1e-1 - 1e4 | Smax_UR   | -     | -     | 516.6              |
| Smoothing parameter for Poten. Evapo. of UR | No units                            | 1e-2 - 10  | Beta_E_UR | -     | -     | 4.767              |
| State initial factor                        | No units                            | 0 - 1      | SiniFR_UR | -     | -     | 0.894              |
| Percolation coefficient                     | t <sup>-1</sup>                     | 1e-6 - 2   | K_Qb_UR   | -     | -     | 1x10 <sup>-6</sup> |
| Parameter of Modified logistic curve        | No units                            | 1e-1 - 1   | mu_Qq_UR  | -     | -     | 1                  |
| Max reservoir storage of IR                 | mm                                  | 1e-1 - 20  | Smax_IR   | -     | -     | -                  |
| Smoothing parameter for Poten. Evapo. of IR | No units                            | 1e-3 - 1   | m_QE_IR   | -     | -     | -                  |
| Infiltration excess threshold               | mm t <sup>-1</sup>                  | 1e-1 - 1e7 | P_ED_max  | -     | -     | -                  |
| Infiltration excess flow smoothing factor   | mm t <sup>-1</sup>                  | 1e-3 - 10  | m_P_ED    | -     | -     | -                  |
| Time delay-HRU to subcatchment outlet       | t                                   | 1e-2 - 5   | lag_HRU   | 3.074 |       |                    |
| Time delay-Subcatchment to catchment outlet | t                                   | 1e-2 - 5   | lag_Sub   | 1.387 |       |                    |

675

**Table A2: FUSE\_TOPO\_M1's model parameter details**

| Model parameter                            | Unit                 | Range     | Symbol    | Model structure |        |       |
|--------------------------------------------|----------------------|-----------|-----------|-----------------|--------|-------|
|                                            |                      |           |           | Hill            | Flood  | Plat. |
| Maximum total storage in upper soil layer  | mm                   | 25-500    | maxwatr_1 | 192.9           | 375.1  | 500.0 |
| Maximum total storage in lower soil layer  | mm                   | 50-5e3    | maxwatr_2 | 5000            | 5000   | 361.8 |
| Fraction total storage as tension storage  | No units             | 0.05-0.95 | fracten   | 0.399           | 0.189  | 0.082 |
| 1st baseflow reservoir's storage fraction  | No units             | 0.05-0.95 | fprimqb   | -               | -      | -     |
| Percolation rate                           | mm day <sup>-1</sup> | 0.01-1e3  | percrt    | 169.19          | 153.98 | -     |
| Percolation exponent                       | No units             | 1-20      | percexp   | 20              | 19.24  | -     |
| Fraction of percolation to tension storage | No units             | 0.05-0.95 | percfrac  | -               | -      | -     |
| Range of the baseflow rate                 | No units             | 1e-3-1e3  | baserte   | 838.5           | 14.9   | 149.0 |
| Baseflow exponent                          | No units             | 1-10      | qb_powr   | 4.369           | 1.188  | 8.993 |



|                                                   |                      |           |           |       |       |       |
|---------------------------------------------------|----------------------|-----------|-----------|-------|-------|-------|
| Mean value:log-transformed topographic index      | m                    | 5-10      | loglamb   | 8.306 | 9.184 | 9.683 |
| Shape para: topo index gamma distribution         | No units             | 2-5       | tishape   | 2     | 5     | 4.1   |
| Time delay in runoff                              | day                  | 0.01-5    | timedelay | 0.01  | -     | -     |
| Range of the fraction of roots in the upper layer | No units             | 0.05-0.95 | rtfrac1   | -     | 0.563 | 0.148 |
| SAC percolation multiplier for dry soil layer     | No units             | 1-250     | sacpmlt   | -     | -     | 109.5 |
| SAC percolation exponent for dry soil layer       | No units             | 1-5       | sacpexp   | -     | -     | 4.266 |
| Interflow rate                                    | mm day <sup>-1</sup> | 0.01-1e3  | iflwrtte  | -     | -     | 711.5 |
| Baseflow depletion rate 1st reservoir             | day <sup>-1</sup>    | 1e-3-0.25 | qbrate_2a | -     | -     | -     |
| Baseflow depletion rate 2nd reservoir             | day <sup>-1</sup>    | 1e-3-0.25 | qbrate_2b | -     | -     | -     |
| Range of the maximum saturated area               | No units             | 0.05-0.95 | sareamax  | -     | -     | -     |
| Time delay-HRU to subcatchment outlet             | day                  | 0.01-5    | lag_HRU   | 2.918 |       |       |
| Time delay-Subcatchment to catchment outlet       | day                  | 0.01-5    | lag_Sub   | 3.180 |       |       |

**Table A3: Model configurations of competitive models – SUPERFLEX**

| Model | WR   | IR | RR   | UR      | FR   | SR | CR | Lag_RR  | Lag_FR | Lag_SR  |
|-------|------|----|------|---------|------|----|----|---------|--------|---------|
| M1    | H, F |    | H    | H, F, P | H    | H  | P  | F, P    | H      | -       |
| M2    | F    | -  | H, F | P       | H, F | -  | -  | H, F    | -      | H, F,P  |
| M3    |      |    | H, F | P       | H, F |    |    | H, F, P | H      | H, F, P |

H: Hill, F: Floodplain, P: Plateau

**Table A4: Model configurations of competitive models – FUSE**

| Model | Upper Architecture |     |     | Lower Architecture |   |   | Surface runoff |   |   | Percolation |     |     | Evaporation |       |       | Interflow |    |    | Routing |    |    |
|-------|--------------------|-----|-----|--------------------|---|---|----------------|---|---|-------------|-----|-----|-------------|-------|-------|-----------|----|----|---------|----|----|
|       | H                  | F   | P   | H                  | F | P | H              | F | P | H           | F   | P   | H           | F     | P     | H         | F  | P  | H       | F  | P  |
| M1    | T/V                | T/V | S   | V                  | V | V | T              | T | T | T/P         | T/P | S   | T/P/S       | V     | V     | NA        | NA | A  | A       | NA | NA |
| M2    | T/V                | T/V | S   | S                  | V | V | V              | T | T | T/P         | T/P | S   | T/P/S       | V     | V     | NA        | NA | A  | A       | NA | NA |
| M3    | T/V                | T/V | T/V | S                  | V | P | T              | T | V | T/P         | T/P | V   | T/P/S       | T/P/S | NA    | NA        | NA | NA | A       | A  | A  |
| M4    | T/V                | T/V | T/V | V                  | V | T | V              | T | V | S           | T/P | S   | V           | T/P/S | T/P/S | A         | NA | NA | NA      | NA | NA |
| M5    | T/V                | T/V | T/V | S                  | V | T | V              | T | V | S           | T/P | S   | V           | T/P/S | T/P/S | A         | NA | NA | NA      | NA | NA |
| M6    | T/V                | P   | T/V | V                  | P | S | V              | V | T | S           | S   | T/P | T/P/S       | T/P/S | T/P/S | A         | NA | NA | A       | NA | A  |

680 As calculated in T: TOPMODEL, V: VIC, P: PRMS, S: SACRAMENTO. A: Allowed, NA: Not allowed

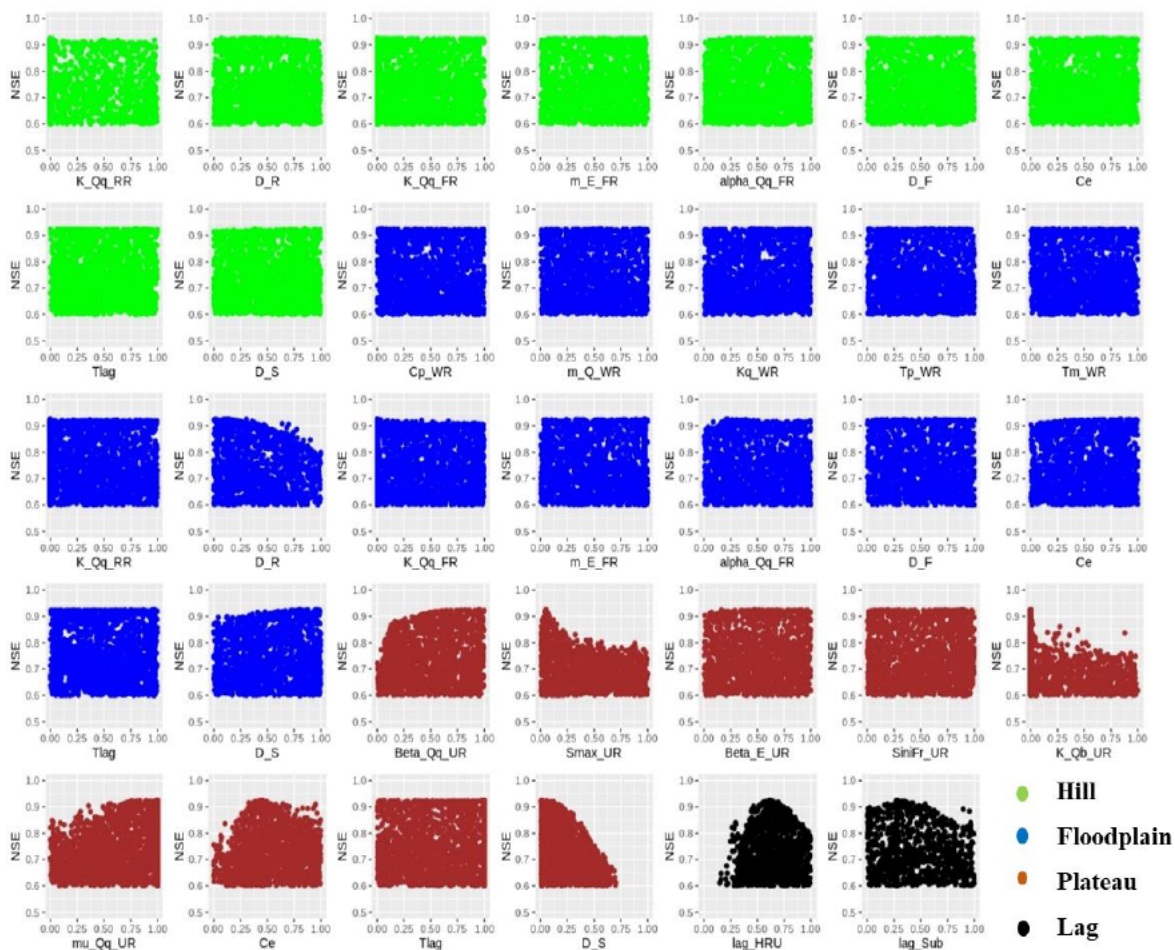

Figure A1: Sensitivity scatter plots of SUPERFLEX\_TOPO\_M2's model parameters



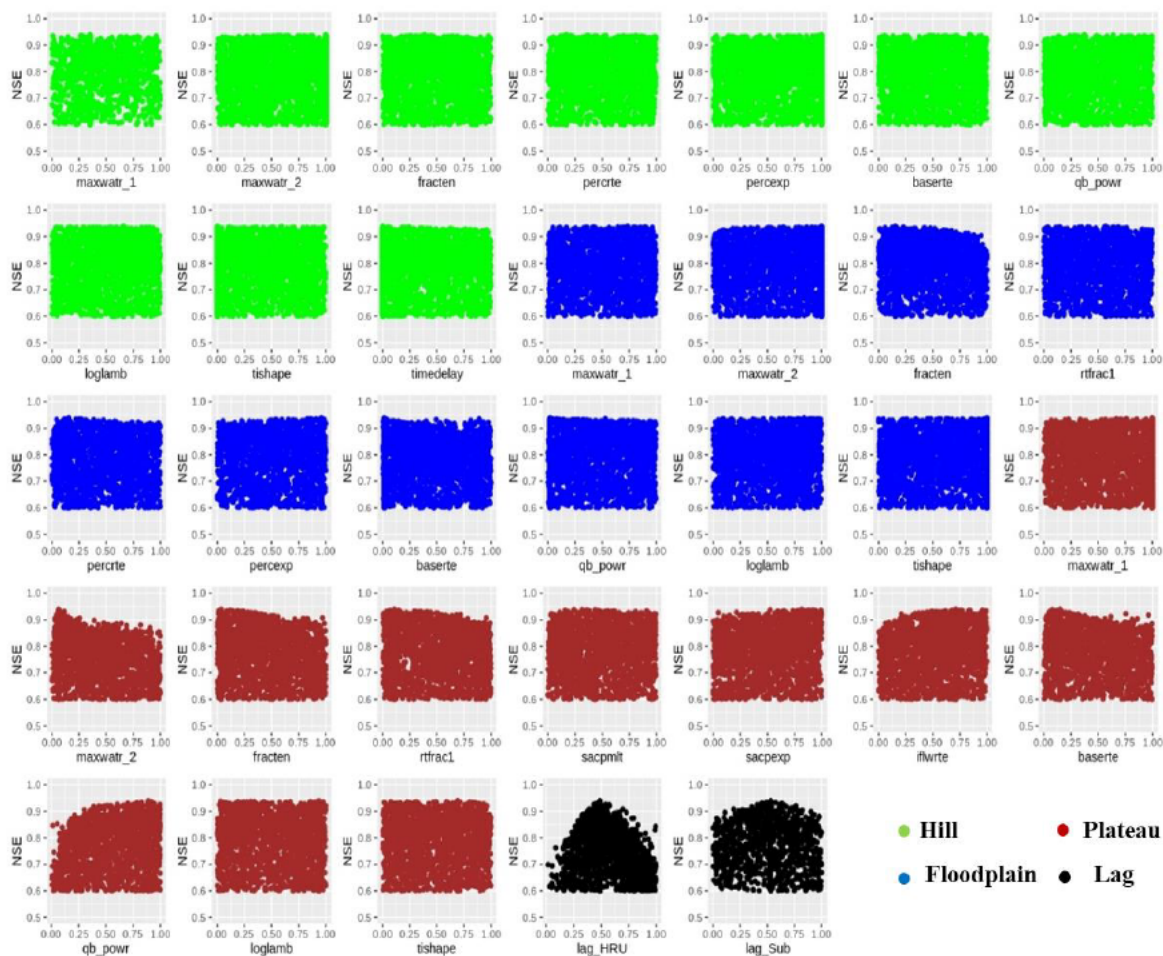

Figure A2: Sensitivity scatter plots of FUSE\_TOPO\_M1's model parameters

685 **Data Availability**

The data sets used in this study are publicly available through the references given in the manuscript.

**Author Contribution**

H. M. V. Vidura Herath: Conceptualization, Formal Analysis, Methodology, Software, Visualization, Writing – original draft

Jayashree Chadalawada: Conceptualization, Methodology, Software

690 Vldan Babovic: Conceptualization, Project administration, Supervision, Writing – review & editing



## Competing Interests

The authors declare that they have no conflict of interest.

## Acknowledgments

We greatly appreciate the support given by Dr. Vojtech Havlicek in R programming. Further, we acknowledge Dr. Fabrizio  
695 Fenicia for his assistance in SUPERFLEX framework.

## References

- Abbott, M. B., Bathurst, J. C., Cunge, J. A., O'Connell P. E. and Rasmussen, J.: An introduction to the European Hydrological  
System – Syst'eme Hydrologique Europ'een (SHE): 1. History and philosophy of a physically based distributed modelling  
system, *Journal of Hydrology*, 87, 45–59, 1986a.
- 700 Abbott, M. B., Bathurst, J. C., Cunge, J. A., O'Connell, P. E., and Rasmussen, J.: An introduction to the European Hydrological  
System – Syst'eme Hydrologique Europ'een, (SHE): 2. Structure of a physically-based distributed modelling system, *Journal  
of Hydrology*, 87, 61–77, 1986b.
- Aerts, J., Kriek, M., and Schepel, M.: STREAM (spatial tools for river basins and environment and analysis of management  
options): 'set up and requirements', *Physics and Chemistry of the Earth, Part B: Hydrology, Oceans and Atmosphere*, 24(6),  
705 591-595, doi:10.1016/s1464-1909(99)00049-0, 1999.
- Afan, H. A., El-Shafie, A., Yaseen, Z. M., Hameed, M. M., Wan Mohtar, W. H. M., and Hussain, A.: ANN based sediment  
prediction model utilizing different input scenarios, *Water Resour. Manage.*, 29, 1231–1245, doi: 10.1007/s11269-014-0870-  
1, 2014.
- Afzaal, H., Farooque, A. A., Abbas, F., Acharya, B., and Esau, T.: Groundwater Estimation from Major Physical Hydrology  
710 Components Using Artificial Neural Networks and Deep Learning, *Water*, 12, 5, doi:10.3390/w12010005, 2019.
- Arnold, J. G., Srinivasan, R., Muttiah, R. S., and Williams, J. R.: Large Area Hydrologic Modeling and Assessment Part I:  
Model Development, *Journal of the American Water Resources Association*, 34, 73–89, 1998.
- Babovic, V.: Data mining in hydrology, *Hydrological Processes*, 19, 1511-1515, 2005.
- Babovic, V.: Introducing knowledge into learning based on genetic programming, *Journal of Hydroinformatics*, 11, 181–193,  
715 2009.
- Babovic, V., and Abbott, M. B.: The evolution of equations from hydraulic data Part II: Applications, *J. Hydraul. Res.*, 35,  
411–430, 1997.
- Babovic, V., and Keijzer, M.: Forecasting of river discharges in the presence of chaos and noise, in: *Coping with floods:  
Lessons learned from recent experiences*, edited by Marsalek, J., nato arw series, Dordrecht, Kluwer, 1999.
- 720 Babovic, V., and Keijzer, M.: Genetic programming as a model induction engine, *Journal of Hydroinformatics*, 2, 35–60, 2000.



- Babovic, V., and Keijzer, M.: Rainfall runoff modelling based on genetic programming, *Hydrology Research*, 33, 331–346, 2002.
- Babovic, V., Keijzer, M., Aguilera, D. R., and Harrington, J.: An evolutionary approach to knowledge induction: Genetic programming in hydraulic engineering, in: *Proceedings of the world water and environmental resources congress*, 64, 725  
Orlando, Florida, 2001.
- Babovic, V., Li, X., and Chadalawada, J.: Rainfall–Runoff Modeling Based on Genetic Programming, in: *Encyclopedia of Water: Science, Technology, and Society*, 5 Volume Set, edited by Maurice, P., Wiley, New York, USA, 1081, 2020.
- Babovic, V., Keijzer, M., and Bundzel, M.: From global to local modelling: a case study in error correction of deterministic models, in: *Proceedings of the Fourth International Conference on Hydroinformatics*, 4, Iowa City, USA, 2000.
- 730 Baptist, M. J., Babovic, V., Uthurburu, J. R., Keijzer, M., Uittenbogaard, R. E., Mynett, A., and Verwey, A.: On inducing equations for vegetation resistance, *Journal of Hydraulic Research*, 45, 435–450, 2007.
- Bautu, A., and Bautu, E.: Meteorological data analysis and prediction by means of genetic programming, in: *Proceedings of the 5<sup>th</sup> workshop on mathematical modeling of environmental and life sciences problems*, 35–42, Constanta, Romania, 2006.
- Beven, K.: Down to basics: Runoff processes and the modelling process, in: *Rainfall-runoff modelling: the primer*, Wiley-  
735 Blackwell, West Sussex, United Kingdom, 1–22, 2012.
- Beven, K.: Deep Learning, Hydrological Processes and the Uniqueness of Place, *Hydrological Processes*, in press, <https://doi.org/10.1002/hyp.13805>, 2020.
- Beven, J. K., and Binley, M. A.: The future of distributed models: Model calibration and uncertainty prediction, *Hydrological Processes*, 6, 278–298, 1992.
- 740 Beven, K., Lamb, R., Quinn, P., Romanowicz, R., Freer, J.: Topmodel, in: *Computer models of watershed hydrology*, edited by Singh, V. P., Water Resource Publications, Colorado, 627–668, 1995.
- Boyle, D. P., Gupta, H. V., Sorooshian, S., Koren, V., Zhang, Z., and Smith, M.: Toward improved streamflow forecasts: Value of semidistributed modelling, *Water Resources Research*, 37, 2749–2759, doi:10.1029/2000wr000207, 2001.
- Brunton, S. L., Proctor, J. L., and Kutz, J.N.: Discovering governing equations from data by sparse identification of nonlinear  
745 dynamical Systems, in: *Proceedings of the National Academy of Sciences*, 113, 3932–3937, 2016.
- Burnash, R. J. C.: The NWS River Forecast System-Catchment modeling, in: *Computer models of watershed hydrology*, edited by Singh, V.P., Water Resource Publications, Colorado, 311–366, 1995.
- Cannon, A. J.: Non-crossing nonlinear regression quantiles by monotone composite quantile regression neural network, with application to rainfall extremes, *Stochastic Environmental Research and Risk Assessment*, 32, 3207–3225, 2018.
- 750 Cannon, A. J., and Mckendry, I. G.: A graphical sensitivity analysis for statistical climate models: Application to indian monsoon rainfall prediction by artificial neural networks and multiple linear regression models, *International Journal of Climatology*, 22, 1687–1708, <https://doi.org/10.1002/joc.811>, 2002.
- Chadalawada, J., and Babovic, V.: Review and comparison of performance indices for automatic model induction, *Journal of Hydroinformatics*, 21, 13–31, 2017.



- 755 Chadalawada, J., Havlicek, V. and Babovic, V.: A Genetic Programming Approach to System Identification of Rainfall-Runoff Models, *Water Resour Manage.*, 31, 3975–3992, doi:10.1007/s11269-017-1719-1, 2017.
- Chadalawada, J., Herath, H. M. V. V., and Babovic, V.: Hydrologically informed machine learning for rainfall-runoff modeling: A genetic programming-based toolkit for automatic model induction, *Water Resources Research*, 56, <https://doi.org/10.1029/2019WR026933>, 2020.
- 760 Chang, L. C., Shen, H. Y., and Chang, F. J.: Regional flood inundation nowcast using hybrid SOM and dynamic neural networks, *J. Hydrol.*, 519, 476–489, <http://dx.doi.org/10.1016/j.jhydrol.2014.07.036>, 2014.
- Chiang, Y.M., Chang, L.C., Chang, F.J.: Comparison of static-feedforward and dynamic-feedback neural networks for rainfall–runoff modeling, *J. Hydrol.*, 290, 297–311, <http://dx.doi.org/10.1016/j.jhydrol.2003.12.033>, 2004.
- Clark, M. P., Nijssen, B., Lundquist, J. D., Kavetski, D., Rupp, D. E., Woods, R. A., et al.: A unified approach for process-  
765 based hydrologic modelling: 1. Modelling concept, *Water Resources Research*, 51, 2498–2514, doi:10.1002/2015wr017198, 2015a.
- Clark, M. P., Nijssen, B., Lundquist, J. D., Kavetski, D., Rupp, D. E., Woods, R. A., et al.: The structure for unifying multiple modelling alternatives (SUMMA), Version 1.0: Technical description, NCAR Tech. Note NCAR/TN-5141STR, 2015b.
- Clark, M. P., Slater, A. G., Rupp, D. E., Woods, R. A., Vrugt, J. A., Gupta, H. V., et al.: Framework for Understanding  
770 Structural Errors (FUSE): A modular framework to diagnose differences between hydrological models, *Water Resources Research*, 44, W00B02, <https://doi.org/10.1029/2007WR006735>, 2008.
- Craig, J. R., Brown, G., Chlumsky, R., Jenkinson, R. W., Jost, G., Lee, K., et al.: Flexible watershed simulation with the Raven hydrological modelling framework, *Environmental Modelling & Software*, 129 (December 2019), 104,728, <https://doi.org/10.1016/j.jenvsoft.2020.104728>, 2020.
- 775 Criss, R. E., and Winston, W. E.: Do Nash values have value? Discussion and alternate proposals, *Hydrological Processes*, 22, 2723, 2008.
- Dahamsheh, A., and Aksoy, H.: Markov chain-incorporated artificial neural network models for forecasting monthly precipitation in arid regions, *Arab. J. Sci. Eng.*, <http://dx.doi.org/10.1007/s13369-013-0810-z>, 2013.
- Datta, B., Prakash, O., and Sreekanth, J.: Application of Genetic Programming Models Incorporated in Optimization Models  
780 for Contaminated Groundwater Systems Management, *Advances in Intelligent Systems and Computing EVOLVE – A Bridge between Probability, Set Oriented Numerics, and Evolutionary Computation V*, 183-199, doi:10.1007/978-3-319-07494-8\_13, 2014.
- Daymet: <https://daymet.ornl.gov/>, last access: 20 March 2020.
- Deb, K., Pratap, A., Agarwal, S., and Meyarivan, T.: A fast and elitist multiobjective genetic algorithm: NSGA-II, *IEEE Transactions on Evolutionary Computation*, 6, 182–197, 2002.
- 785 Dehghani, M., Saghafian, B., Nasiri Saleh, F., Farokhnia, A., and Noori, R.: Uncertainty analysis of streamflow drought forecast using artificial neural networks and Monte-Carlo simulation, *Int. J. Climatol.*, 34, 1169–1180, <http://dx.doi.org/10.1002/joc.3754>, 2014.



- 790 Delgado-Bonal, A., and Marshak, A.: Approximate Entropy and Sample Entropy: A Comprehensive Tutorial, *Entropy*, 21, 541, doi:10.3390/e21060541, 2019.
- Elshorbagy, A., and El-Baroudy, I.: Investigating the capabilities of evolutionary data-driven techniques using the challenging estimation of soil moisture content, *Journal of Hydroinformatics*, 11, 237–251, 2009.
- Elshorbagy, A., Simonovic, S. P., and Panu, U. S.: Estimation of missing streamflow data using principles of chaos theory. *Journal of Hydrology*, 255, 123–133, 2002.
- 795 Fan, H., Jiang, M., Xu, L., Zhu, H., Cheng, J., and Jiang, J.: Comparison of Long Short Term Memory Networks and the Hydrological Model in Runoff Simulation, *Water*, 12, 175, doi:10.3390/w12010175, 2020.
- Fatichi, S., Vivoni, E. R., Ogden, F. L., Ivanov, V. Y., Mirus, B., Gochis, D., et al.: An overview of current applications, challenges, and future trends in distributed process-based models in hydrology, *Journal of Hydrology*, 537, 45-60, doi: 10.1016/j.jhydrol.2016.03.026, 2016.
- 800 Fenicia, F., Kavetski, D., and Savenije, H. H. G.: Elements of a flexible approach for conceptual hydrological modeling: 1. Motivation and theoretical development, *Water Resources Research*, 47, W11510, <https://doi.org/10.1029/2010WR010174>, 2011.
- Fenicia, F., Kavetski, D., Savenije, H. H. G., Clark, M. P., Schoups, G., Pfister, L., and Freer, J.: Catchment properties, function, and conceptual model representation: Is there a correspondence? *Hydrological Processes*, 28, 2451–2467, 2014.
- 805 Fenicia, F., Kavetski, D., Savenije, H. H., and Pfister, L.: From spatially variable streamflow to distributed hydrological models: Analysis of key modelling decisions, *Water Resources Research*, 52, 954–989, doi:10.1002/2015WR017398, 2016.
- Ferreira, L. B., Cunha, F. F., Oliveira, R. A., and Filho, E. I.: Estimation of reference evapotranspiration in Brazil with limited meteorological data using ANN and SVM – A new approach, *Journal of Hydrology*, 572, 556-570, doi: 10.1016/j.jhydrol.2019.03.028, 2019.
- 810 Fleming, S. W.: Artificial neural network forecasting of nonlinear Markov processes, *Canadian Journal of Physics*, 85, 279–294, <https://doi.org/10.1139/p07-037>, 2007.
- Fleming, S. W., Bourdin, D. R., Campbell, D., Stull, R. B., and Gardner, T.: Development and operational testing of a super-ensemble artificial intelligence flood-forecast model for a Pacific Northwest River, *JAWRA Journal of the American Water Resources Association*, 51, 502–5125, <https://doi.org/10.1111/jawr.12259>, 2014.
- 815 Freeze R. A. and Harlan R. L.: Blueprint for a physically-based, digitally-simulated hydrologic response model, *Journal of Hydrology*, 9, 237–258, 1969.
- García-Alba, J., Bárcena, J. F., Ugarteburu, C., and García, A.: Artificial neural networks as emulators of process-based models to analyse bathing water quality in estuaries, *Water Research*, 150, 283-295, doi: 10.1016/j.watres.2018.11.063, 2019.
- Gholami, V., Chau, K.W., Fadaee, F., Torkaman, J., and Ghaffari, A.: Modeling of groundwater level fluctuations using dendrochronology in alluvial aquifers, *Journal of Hydrology*, 529, 1060–1069, 2015.
- 820 Giorgino, T.: Computing and Visualizing Dynamic Time Warping Alignments in R: The dtw Package, *Journal of Statistical Software*, 31, 1–24, 2009.



- Giuliani, M., Castelletti, A., Pianosi, F., Mason, E., and Reed, P. M.: Curses, tradeoffs, and scalable management: Advancing evolutionary multiobjective direct policy search to improve water reservoir operations, *Journal of Water Resources Planning and Management*, 142, 4,015,050, [https://doi.org/10.1061/\(asce\)wr.1943-5452.0000570](https://doi.org/10.1061/(asce)wr.1943-5452.0000570), 2015.
- Govindaraju, R. S.: Artificial neural networks in hydrology. II: Hydrologic applications, *Journal of Hydrologic Engineering*, 5, 124–137, 2000.
- Gude, V., Corns, S., and Long, S.: Flood Prediction and Uncertainty Estimation Using Deep Learning, *Water*, 12, 884, doi:10.3390/w12030884, 2020.
- 830 Gupta, H. V., Kling, H., Yilmaz, K. K., and Martinez, G. F.: Decomposition of the mean squared error and NSE performance criteria: Implications for improving hydrological modelling, *Journal of Hydrology*, 377, 80–91, 2009.
- Havliček, V., Hanel, M., Maca, P., Kuraž, M., and Pech, P.: Incorporating basic hydrological concepts into genetic programming for rainfall-runoff forecasting, *Computing*, 95, 363–380, 2013.
- Hsieh, W.W.: *Machine learning in the environmental sciences*, Cambridge University Press, Cambridge, United Kingdom: 835 2009.
- Hu, C., Wu, Q., Li, H., Jian, S., Li, N., and Lou, Z.: Deep Learning with a Long Short-Term Memory Networks Approach for Rainfall-Runoff Simulation, *Water*, 10, 1543, doi:10.3390/w10111543, 2018.
- Humphrey, G. B., Gibbs, M. S., Dandy, G. C., and Maier, H. R.: A hybrid approach to monthly streamflow forecasting: Integrating hydrological model outputs into a Bayesian artificial neural network, *Journal of Hydrology*, 540, 623–640, 2016.
- 840 Karimi, S., Shiri, J., Kisi, O., and Shiri, A. A.: Short-term and long-term streamflow prediction by using ‘wavelet-gene expression’ programming approach, *ISH Journal of Hydraulic Engineering*, 22, 148–162, 2016.
- Karpatne, A., Atluri, G., Faghmous, J. H., Steinbach, M., Banerjee, A., Ganguly, A., et al.: Theory-guided data science: A new paradigm for scientific discovery from data, *IEEE Transactions on Knowledge and Data Engineering*, 29, 2318–2331, doi: 10.1109/TKDE.2017.2720168, 2017.
- 845 Kavetski, D., and Fenicia, F.: Elements of a flexible approach for conceptual hydrological modeling: 2. Application and experimental insights, *Water Resources Research*, 47, W11511, <https://doi.org/10.1029/2011WR010748>, 2011.
- Keijzer, M., and Babovic, V.: Declarative and preferential bias in GP-based scientific discovery, *Genetic Programming and Evolvable Machines*, 3, 41–79, 2002.
- Khu, S. T., Liong, S.Y., Babovic, V., Madsen, H., and Muttill, N.: Genetic programming and its application in real-time runoff 850 forecasting, *Journal of the American Water Resources Association*, 37, 439–451, 2001.
- Knoben, W. J., Freer, J. E., Fowler, K. J., Peel, M. C., and Woods, R. A.: Modular Assessment of Rainfall–Runoff Models Toolbox (MARRMoT) v1.2: An open-source, extendable framework providing implementations of 46 conceptual hydrologic models as continuous state-space formulations, *Geoscientific Model Development*, 12, 2463–2480, doi:10.5194/gmd-12-2463-2019, 2019.
- 855 Koza, J. R.: *Genetic programming: on the programming of computers by means of natural selection*, 1, MIT press, Cambridge, Massachusetts, England, 1992.



- Kratzert, F., Klotz, D., Herrnegger, M., Sampson, A. K., Hochreiter, S., and Nearing, G.: Toward improved predictions in ungauged basins: Exploiting the power of machine learning, *Water Resources Research*, 55, 11344–11354, <https://doi.org/10.1029/2019WR026065>, 2019.
- 860 Krause, P., Boyle, D., and Base, F.: Comparison of different efficiency criteria for hydrological model assessment, *Advances in Geosciences*, 5, 89–97, 2005.
- Kumar, D., Singh, A., Samui, P., and Jha, R. K.: Forecasting monthly precipitation using sequential modelling, *Hydrological Sciences Journal*, 64, 690–700, doi: 10.1080/02626667.2019.1595624, 2019.
- Leavesley, G. H., Markstrom, S. L., Viger, R. J., and Hay, L. E.: The Modular Modelling System (MMS): a toolbox for water- and environmental resources management, in: *Hydrological Modeling in Arid and Semi-Arid Areas*, edited by Wheater, H., Sorooshian, S., and Sharma, K. D., Cambridge University Press, 87–98, doi: 10.1017/CBO9780511535734.008, 2008.
- 865 Ley, R., Hellebrand, H., Casper, M. C., and Fenicia, F.: Comparing classical performance measures with signature indices derived from flow duration curves to assess model structures as tools for catchment classification, *Hydrology Research*, 47, 1–14, 2016.
- 870 McClelland, J. L., and Rumelhart, D. E.: *Parallel distributed processing: Explorations in the microstructure of cognition*, The MIT Press, Massachusetts, Cambridge, 1986.
- McGovern, A., Lagerquist, R., Gagne, D. J., Jergensen, G. E., Elmore, K. L., Homeyer, C. R., and Smith, T.: Making the black box more transparent: Understanding the physical implications of machine learning, *Bulletin of the American Meteorological Society*, 2175–2199, 2019.
- 875 Mehr, A. D., Nourani, V., Kahya, E., Hrnjica, B., Sattar, A. M. A., and Yaseen, Z. M.: Genetic programming in water resources engineering: A state-of-the-art review, *Journal of Hydrology*, 566, 643–667, 2018.
- Meshgi, A., Schmitter, P., Babovic, V., and Chui, T. F. M.: An empirical method for approximating stream baseflow time series using groundwater table fluctuations, *Journal of Hydrology*, 519, 1031–1041, 2014.
- Meshgi, A., Schmitter, P., Chui, T. F. M., and Babovic, V.: Development of a modular streamflow model to quantify runoff contributions from different land uses in tropical urban environments using genetic programming, *Journal of Hydrology*, 880 525, 711–723, 2015.
- Minns, A. W., and Hall, M. J.: Artificial neural networks as rainfall-runoff models, *Hydrological Sciences Journal*, 41, 399–417, 1996.
- Molin, M. D., Schirmer, M., Zappa, M., and Fenicia, F.: Understanding dominant controls on streamflow spatial variability to set up a semi-distributed hydrological model: The case study of the Thur catchment, *Hydrology and Earth System Sciences*, 885 24(3), 1319–1345, doi:10.5194/hess-24-1319-2020, 2020.
- Nash, J. E., and Sutcliffe, J. V.: River flow forecasting through conceptual models Part I—A discussion of principles, *Journal of hydrology*, 10, 282–290, 1970.
- Nayak, P. C., Satyaji Rao, Y. R., and Sudheer, K. P.: Groundwater level forecasting in a shallow aquifer using artificial neural network Approach, *Water Resources Management*, 20, 77–90, <https://doi.org/10.1007/s11269-006-4007-z>, 2006.
- 890



- Nearing, G. S., Kratzert, F., Sampson, A. K., Pelissier, C. S., Klotz, D., Frame, J. M., and Gupta, H. V.: What Role Does Hydrological Science Play in the Age of Machine Learning?, *Water Resources Research*, in press, 2020.
- Newman, A. J., Clark, M. P., Sampson, K., Wood, A., Hay, L. E., Bock, A., et al.: Development of a large-sample watershed-scale hydrometeorological dataset for the contiguous USA: Dataset characteristics and assessment of regional variability in hydrologic model performance, *Hydrology and Earth System Sciences*, 19, 209–223, 2015.
- 895 Nielsen, S. A., and Hansen, E.: Numerical simulation of the rainfall-runoff process on a daily basis, *Hydrology Research*, 4, 171–190, 1973.
- Nourani, V., Komasi, M., and Mano, A.: A multivariate ANN-wavelet approach for rainfall-runoff modelling, *Water Resources Management*, 23, 2877–2894, <https://doi.org/10.1007/s11269-009-9414-5>, 2009.
- 900 O’Connell, P. E.: A historical perspective, in: *Recent Advances in the Modeling of Hydrologic Systems*, edited by: Bowles, D. S., and O’Connell, P. E., Springer Science+Business Media, B.V., Kluwer, Dordrecht, 3–30, doi:10.1007/978-94-011-3480-4, 1991.
- Official Soil Series Descriptions: <https://soilseries.sc.egov.usda.gov/>, last access:29 July 2020.
- Oyebode, O. K., and Adeyemo, J. A.: Genetic programming: Principles, applications and opportunities for hydrological modelling, *World Academy of Science, Engineering and Technology International Journal of Environmental, Chemical, Ecological, Geological and Geophysical Engineering*, 8, 348–354, 2014.
- 905 Physics Informed Machine Learning Conference, Santa Fe, New Mexico, USA, 2016.
- QGIS.org: QGIS Geographic Information System, Open Source Geospatial Foundation Project, <http://qgis.org>, 2020.
- R Core Team.: R: A language and environment for statistical computing. R Foundation for Statistical Computing, Vienna, Austria, <https://www.R-project.org/>, 2018.
- 910 Raissi, M., Perdikaris, P., and Karniadakis, G. E.: Physics informed deep learning (Part II): Data-driven discovery of nonlinear partial differential equations, *arXiv preprint arXiv:1711.10566*, 2017.
- Richman, J. S., and Moorman, J. R.: Physiological time-series analysis using approximate entropy and sample entropy, *Am. J. Physiol. Heart Circul. Physiol.*, 278, 20139–20149, doi:10.1152/ajpheart.2000.278.6.H2039, 2000.
- 915 Rudy, S. H., Brunton, S. L., Proctor, J. L., and Kutz, J. N.: Data-driven discovery of partial differential equations, *Science Advances*, 3, 1602614, 2017.
- Safari, M. J. S., and Mehr, A. D.: Multigene genetic programming for sediment transport modeling in sewers at non-deposition with deposited bed condition, *Int. J. Sedim. Res.*, <https://doi.org/10.1016/j.ijsrc.2018.04.007>, 2018.
- Sakoe, H. and Chiba, S.: Dynamic programming algorithm optimization for spoken word recognition, *IEEE Trans. on Acoust., Speech, and Signal Process*, 26, 43–49, 1978.
- 920 Salas, F. R., Somos-Valenzuela, M. A., Dugger, A., Maidment, D. R., Gochis, D. J., David, C. H., et al.: Towards real-time continental scale streamflow simulation in continuous and discrete space, *JAWRA Journal of the American Water Resources Association*, 54, 7-27, 2018.





- Salvador, S., and Chan, P.: Toward accurate dynamic time warping in linear time and space, *Intelligent Data Analysis*, 11, 561–580, doi:10.3233/ida-2007-11508, 2007.
- Savic, D., and Khu, S. T.: Evolutionary computing in hydrological sciences. in: *Encyclopedia of Hydrological Sciences*, edited by: Anderson, M. G., 331–348, Wiley, New York, USA, 2005.
- Selle, B., and Muttill, N.: Testing the structure of a hydrological model using genetic programming, *Journal of Hydrology*, 397, 1–9, 2011.
- Shen, C.: A trans-disciplinary review of deep learning research and its relevance for water resources scientists, *Water Resour. Res.*, <https://doi.org/10.1029/2018WR022643>, 2018.
- Shen, C., Laloy, E., Elshorbagy, A., Albert, A., Bales, J., Chang, F., . . . Tsai, W.: HESS Opinions: Incubating deep-learning-powered hydrologic science advances as a community, *Hydrology and Earth System Sciences*, 22, 5639–5656, doi:10.5194/hess-22-5639-2018, 2018.
- Singh, G., Kandasamy, J., Shon, H.K., and Cho, J.: Measuring treatment effectiveness of urban wetland using hybrid water quality – artificial neural network (ANN) model, *Desalin. Water Treat.*, 32, 284–290, doi: 10.5004/dwt.2011.2712, 2011.
- Snauffer, A. M., Hsieh, W. W., Cannon, A. J., and Schnorbus, M. A.: Improving gridded snow water equivalent products in British Columbia, Canada: Multi-source data fusion by neural network models, *The Cryosphere*, 12, 891–905, 2018.
- Solander, K. C., Bennett, K. E., Fleming, S. W., and Middleton, R. S.: Estimating hydrologic vulnerabilities to climate change using simulated historical data: A proof-of-concept for a rapid assessment algorithm in the colorado river basin, *Journal of Hydrology: Regional Studies*, 26, 100,642, 2019.
- Sugawara, M.: Automatic calibration of the tank model/l'etalonnage automatique d'un modele a cisterne, *Hydrological Sciences Journal*, 24, 375–388, 1979.
- Sun, Y., Babovic, V., and Chan, E. S.: Artificial neural networks as routine for error correction with an application in Singapore regional Model, *Ocean Dynamics*, 62, 661–669, 2012.
- Todini, E.: The ARNO rainfall-runoff model, *J. Hydrol.*, 175, 339–382, doi:10.1016/S0022-1694(96)80016-3, 1996.
- USDA's Geospatial Data Gateway: <http://datagateway.nrcs.usda.gov/>, last access: 21 March 2020.
- USGS EarthExplorer: <https://earthexplorer.usgs.gov/>, last access: 20 March 2020.
- van Esse, W. R., Perrin, C., Booij, M. J., Augustijn, D. C. M., Fenicia, F., Kavetski, D., and Lobligeois, F.: The influence of conceptual model structure on model performance: a comparative study for 237 French catchments, *Hydrol. Earth Syst. Sci.*, 17, 4227–4239, <https://doi.org/10.5194/hess-17-4227-2013>, 2013.
- Vitolo, C.: Exploring data mining for hydrological modelling, Ph.D. thesis, Department of Civil and Environmental Engineering, Imperial College London, United Kingdom, 2015.
- Vojinovic, Z., Kecman, V., and Babovic, V.: Hybrid approach for modeling wet weather response in wastewater systems, *Journal of water resources planning and management*, 129, 511–521, 2003.
- Wagner, T., Boyle, D. P., Lees, M. J., Wheeler, H. S., Gupta, H. V., and Sorooshian, S.: A framework for development and application of hydrological models, *Hydrology and Earth System Sciences Discussions*, 5, 13–26, 2001.



- Wang, N., Zhang, D., Chang, H., and Li, H.: Deep learning of subsurface flow via theory-guided neural network, *Journal of Hydrology*, 584, 124700, doi: 10.1016/j.jhydrol.2020.124700, 2020.
- 960 Xiaodong, S., Ganlin, Z., Feng, L., Decheng, L., Yuguo, Z., and Jinling, Y.: Modeling spatio-temporal distribution of soil moisture by deep learning-based cellular automata model, *Journal of Arid Land*, 8, 734–748, doi: 10.1007/s40333-016-0049-0, 2016.
- Xiang, Z., Yan, J., and Demir, I.: A rainfall-runoff model with LSTM-based sequence-to-sequence learning, *Water Resources Research*, 56, e2019WR025326, <https://doi.org/10.1029/2019WR025326>, 2020.
- 965 Xu, T., Longyang, Q., Tyson, C., Zeng, R., Neilson, B. T., and Tarboton, D. G.: Hybrid physically-based and deep learning modeling of a snow dominated mountainous karst watershed, in: Presentation at the American Geophysical Union fall meeting, San Francisco, CA, 2019.
- Yaseen, Z.M., El-shafie, A., Jaafar, O., and Afan, H.A.: Artificial intelligence based models for stream-flow forecasting: 2000-2015, *Journal of Hydrology*, 530, 829-844, <http://dx.doi.org/10.1016/j.jhydrol.2015.10.038>, 2015.

970
